1 **Title**

2

3 Identification of a transcriptional signature found in multiple models of ASD and related disorders

4

5 **Authors**

6

7 Samuel Thudium<sup>a,b</sup>, Katherine Palozola<sup>a,b</sup>, Eloise L'Her<sup>a,b</sup>, Erica Korb<sup>a,b,\*</sup>

8

9 **Author Affiliations**

10

11 Department of Genetics<sup>a</sup>, Epigenetics Institute<sup>b</sup>, Perelman School of Medicine at the University

12 of Pennsylvania, Philadelphia, PA 19104, USA.

13 Corresponding author, \*

14

15 **Abstract**

16

17 Epigenetic regulation plays a critical role in many neurodevelopmental disorders, including  
18 Autism Spectrum Disorder (ASD). In particular, many such disorders are the result of mutations  
19 in genes that encode chromatin modifying proteins. However, while these disorders share many  
20 features, it is unclear whether they also share gene expression disruptions resulting from the  
21 aberrant regulation of chromatin. We examined 5 chromatin modifiers that are all linked to ASD  
22 despite their different roles in regulating chromatin. Specifically, we depleted Ash1L, Chd8,  
23 Crebbp, Ehmt1, and Nsd1 in parallel in a highly controlled neuronal culture system. We then  
24 identified sets of shared genes, or transcriptional signatures, that are differentially expressed  
25 following loss of multiple ASD-linked chromatin modifiers. We examined the functions of genes  
26 within the transcriptional signatures and found an enrichment in many neurotransmitter transport  
27 genes and activity-dependent genes. In addition, these genes are enriched for specific  
28 chromatin features such as bivalent domains that allow for highly dynamic regulation of gene  
29 expression. The downregulated transcriptional signature is also observed within multiple mouse  
30 models of neurodevelopmental disorders that result in ASD, but not those only associated with  
31 intellectual disability. Finally, the downregulated transcriptional signature can distinguish  
32 between neurons generated from iPSCs derived from healthy donors and idiopathic ASD  
33 patients through RNA-deconvolution, demonstrating that this gene set is relevant to the human

34 disorder. This work identifies a transcriptional signature that is found within many  
35 neurodevelopmental syndromes, helping to elucidate the link between epigenetic regulation and  
36 the underlying cellular mechanisms that result in ASD.

37

## 38 **Introduction**

39

40 Neurodevelopmental Disorders (NDDs) that result in Autism Spectrum Disorder (ASD) are  
41 caused by both environmental and genetic factors. Even within the subset of disorders that have  
42 a clear genetic cause, each individual syndrome stems from a unique mutation in an increasingly  
43 long list of ASD susceptibility genes. Such heterogeneity has made it difficult to develop a unifying  
44 model of the disruptions that lead to shared phenotypes or to develop treatments that address  
45 shared underlying causes. Interestingly, recent studies demonstrated that a disproportionate  
46 number of ASD susceptibility genes encode epigenetic regulators (Lossifov et al., 2014; O’Roak  
47 et al., 2012; Parikshak et al., 2013; De Rubeis et al., 2014). In particular, many such mutations  
48 are found in proteins that regulate chromatin, the complex of DNA and histone proteins that helps  
49 to regulate transcription.

50 Histones are regulated by numerous posttranslational modifications such as acetylation,  
51 methylation, and many others, which ultimately affect transcription. These modifications recruit  
52 transcriptional regulators and allow chromatin to transition between the open and closed states  
53 that are permissive or repressive to transcription, thus providing a complex code that regulates  
54 gene expression (Berger, 2007; Jenuwein and Allis, 2001; Strahl and Allis, 2000; Turner, 2000).  
55 The importance of this ‘histone code’ or ‘language’ is becoming increasingly appreciated in  
56 neuroscience, from its function in memory formation to its involvement in neurodevelopmental  
57 disorders (Borrelli et al., 2008; Peixoto and Abel, 2013; Rangasamy et al., 2013). However, it  
58 remains unclear if the different forms of syndromic ASD that result from mutations in distinct  
59 chromatin regulators share transcriptional disruptions.

60 Determining whether disruption of multiple syndromic ASD-linked chromatin modifiers with  
61 disparate functions leads to overlapping gene expression changes presents multiple challenges.  
62 Thus far, such chromatin modifiers have been analyzed individually in different systems, but never  
63 in parallel in a controlled genetic background. As a result, while our understanding of these  
64 disorders has improved drastically in recent years, previous studies were not designed to allow  
65 for a comparison between different causes of ASD or identify common pathways that underlie  
66 shared phenotypes. Work examining the effects of loss of these chromatin modifying proteins in  
67 animals is also confounded by the full body and lifelong loss of these proteins throughout

68 development. Thus, the complexity of the compensatory response and other related health effects  
69 may occlude any relevant transcriptional signature that could answer these outstanding  
70 questions. Finally, many neurodevelopmental disorders result in a range of phenotypes and often  
71 cause *both* ASD and intellectual disability (ID), so identifying which underlying epigenetic  
72 disruptions are associated with one or both phenotypes poses additional hurdles.

73 To overcome these challenges, we developed a primary neuronal culture system that  
74 allows us to study multiple syndromic ASD-linked chromatin modifiers in parallel, in a controlled  
75 genetic background, with the goal of defining the common gene expression patterns caused by  
76 disruption of these proteins. Remarkably, we found that loss of five such proteins, despite having  
77 a diverse array of functions, all cause disruption of similar sets of genes, particularly for  
78 downregulated genes. We termed the sets of genes disrupted by depletion of the majority of the  
79 chromatin modifiers *transcriptional signatures*. These signatures encoded genes relevant to  
80 synaptic function, including activity-dependent genes. Further, these genes shared several  
81 chromatin features, including bivalent domains, that may make them particularly sensitive to  
82 chromatin disruptions. In addition, the downregulated gene signature that we identified in cultured  
83 neurons is also present in animal models of NDDs that result in ASD. However, they are not  
84 present in disorders that result in ID in the absence of ASD, or in a neurodegenerative disorder.  
85 Finally, we mapped this signature onto gene expression data from human induced pluripotent  
86 stem cell (iPSC) derived neurons and found that it is able to distinguish between control and  
87 idiopathic ASD patient cells. These data indicate that common sets of genes are disrupted after  
88 loss of multiple chromatin-associated proteins linked to ASD. Moreover, these genes control  
89 critical neuronal functions, share chromatin features, and are also disrupted in multiple mouse  
90 models and in ASD iPSC derived neurons. Defining this signature provides novel insights into the  
91 cellular disruptions that contribute to ASD and how mutations in a diverse array of histone-  
92 modifying enzymes can lead to common phenotypic outputs.

93

## 94 **Results**

95

### 96 **Defining gene expression profiles of syndromic ASD-linked chromatin modifiers**

97

98 We sought to determine if the loss of different chromatin modifying enzymes linked to  
99 related neurodevelopmental disorders results in a common transcriptional signature. To define  
100 such a signature, we focused on five chromatin modifiers, Ash1L, Chd8, Crebbp, Ehmt1, and  
101 Nsd1, associated with syndromes that include intellectual disability and ASD traits. (**Table 1**). Of

102 the many chromatin regulators linked to such disorders (Neale et al., 2012; O’Roak et al., 2012;  
103 Sanders et al., 2012; De Rubeis et al., 2014; lossifov et al., 2014), we chose the subset that led  
104 to well-defined syndromes caused by loss-of-function mutations or deletions (Abrahams et al.,  
105 2013). This ensured we examined proteins whose loss results in NDDs with high penetrance.  
106 Further, these 5 proteins among the top ASD risk genes as identified by TADA analysis (Fu et al.,  
107 2021) with 4 of the 5 in the top 100 susceptibility genes for idiopathic ASD and in the same gene  
108 expression module (based on BrainSpan data) which contains the greatest enrichment of ASD  
109 susceptibility genes (Ji et al., 2016). We further selected for chromatin regulators with mouse  
110 models that recapitulate the features of the associated disorder to ensure that mouse neuronal  
111 models are an appropriate system in which to study their function (Benevento et al., 2016; Bernier  
112 et al., 2014; Couptry et al., 2002; Eram et al., 2015; Gao et al., 2021; Kleefstra et al., 2006, 2009;  
113 Kurotaki et al., 2002; Neale et al., 2012; Niikawa, 2004; Shen et al., 2019). Finally, we selected a  
114 set of chromatin modifiers that have a diverse array of functions in chromatin. These proteins  
115 target different substrates in chromatin including modifying different histone proteins and  
116 residues. They also perform a diverse array of functions such adding different types of  
117 modifications. For example, CREBBP acetylates histones, Emht1 methylates H3K9, while Ash1L  
118 and Nsd1 promote different methylation states of H3K36 (Jin et al., 2011; Miyazaki et al., 2013;  
119 Qiao et al., 2011; Tachibana et al., 2008; Thompson et al., 2008). Finally, some are associated  
120 with active gene expression (Crebbp, Ash1l, Nsd1) while others are associated with repressive  
121 gene expression (Ehmt1, Chd8). Thus, we would not expect these proteins to target the same set  
122 of genes or their loss to result in similar transcriptional profiles solely based on having shared  
123 functions in modulating chromatin. Instead, the major commonality between these proteins is that  
124 their disruption leads to ID and ASD, so any overlapping gene expression changes are more likely  
125 to be relevant to shared phenotypic output.

126 To study the effects of the loss of these chromatin modifiers in parallel, we used a primary  
127 neuronal culture system and lentiviral shRNA knockdown of each chromatin modifier (**Fig. 1A**).  
128 There are several advantages to this approach: 1) This culture method generates a purely  
129 neuronal population (Korb et al., 2015) and thus avoids the heterogeneity of brain tissue and the  
130 compounding effects of a system-wide knockout; 2) Neurons are cultured from embryonic mouse  
131 brains which allows for the investigation of early neuronal development time points that are  
132 relevant to the onset of NDDs and ASD; 3) Neurons are analyzed 5 days after knockdown thus  
133 avoiding long-term compensatory responses resulting from life-long loss of function; 4) For each  
134 biological replicate, each candidate gene is knocked down simultaneously from neurons cultured  
135 from the same animal, thereby controlling for both genetic background, developmental time point,

136 and variation between animals; and 5) Multiple replicates can be generated and processed in  
137 parallel to allow for a high degree of rigor using true biological replicates (each coming from  
138 separate litters of mice) while also minimizing technical variability. While ID and ASD can be  
139 caused by atypical brain region connectivity that cannot be detected in our system, our goal is to  
140 define the underlying cellular mechanisms *within* neurons that ultimately lead to wider disruptions.

141 Primary cultured neurons were infected with lentiviruses containing shRNAs targeting  
142 each syndromic ASD-linked chromatin modifier or with a non-targeting control shRNA at five days  
143 in culture. Neurons were then collected 5 days after infection to allow for robust depletion of target  
144 proteins. We used RT-qPCR to examine the degree of knockdown achieved through lentiviral  
145 infection and confirmed depletion of all target transcripts (**Supplemental Fig. 1A**). We further  
146 confirmed knockdown of the target proteins in all cases where antibodies were available  
147 (**Supplemental Fig. 1B**). We then used RNA-sequencing (RNA-seq) to define gene expression  
148 changes resulting from knockdown of all five chromatin-associated proteins and further confirmed  
149 knockdown through sequencing data (**Fig. 1B-G**). Having ensured robust knockdown through  
150 multiple approaches, we analyzed all gene expression after depletion of each chromatin modifier.  
151 As expected, in all cases knockdown resulted in robust gene expression changes, with genes  
152 both increased and decreased in expression compared to non-targeting control shRNA infection  
153 (**Fig. 1H, Supplemental Figure 2**).

154

### 155 **Overlap of gene expression changes caused by loss of ASD-linked chromatin modifiers**

156

157 To examine potential overlap in the resulting gene expression changes, we took several  
158 approaches. First, we examined the direct overlap of each possible pairwise comparison and  
159 used a hypergeometric test to determine the significance of the number of overlapping genes.  
160 Remarkably, we found that direct comparison of every downregulated gene set was significant  
161 and the same was true of each upregulated gene set overlap (**Fig. 2A**). Conversely, comparison  
162 of each upregulated gene set with each downregulated gene set yielded almost no significant  
163 overlaps. These findings indicate that many of the same genes are differentially regulated by  
164 these 5 ASD-linked chromatin modifiers. This is particularly remarkable because these 5  
165 chromatin modifiers were chosen specifically based on their divergent functions in regulating  
166 chromatin and thus their depletion would not necessarily be expected to have similar effects on  
167 gene expression. Instead, the significance of these overlaps indicates that this subset of genes  
168 may be particularly sensitive to disruption of ASD-linked chromatin modifiers in neurons.

169 We next examined all higher-order intersections between these gene sets to determine  
170 which genes are commonly disrupted in response to knockdown of multiple ID/ASD-linked  
171 chromatin modifiers (**Fig. 2B-C**). Only 6 genes were common between all datasets for both up  
172 (Trak2, Snap29, Prickle1, Ccnt1, Ppig, and Fam214b) and downregulated (Fcgrt, Dbp, Al464131,  
173 Creb3l1, Ret, and Isoc1) genes. However, 209 downregulated and 133 upregulated genes were  
174 shared by knockdown of the majority (at least 3 of the 5) of the ASD-linked chromatin modifiers.  
175 Thus, while these ASD-linked chromatin modifiers all have different functions in regulating  
176 chromatin and target different histone residues and genomic regions, the gene expression  
177 changes resulting from their depletion converge on common subsets of genes, particularly for  
178 downregulated genes. For simplicity, we will refer to the sets of genes that are up or  
179 downregulated in response to the majority of these chromatin modifiers as *transcriptional*  
180 *signatures*. Given the greater number of downregulated genes shared between the 5 chromatin  
181 modifiers analyzed, we will largely focus on the downregulated gene signature here and include  
182 all analyses of the upregulated signature in supplemental figures.

183

#### 184 **Functional enrichments in the transcriptional signatures**

185

186 We first sought to define the gene functions encoded by the up and down transcriptional  
187 signatures using Gene Ontology (GO) analysis. We found that the top enriched terms for the  
188 downregulated signature included processes such as neurotransmitter transport and nervous  
189 system development, as would be expected for a gene set that is linked to ASD and ID (**Fig. 3A**).  
190 To ensure that the functional groups we identified weren't unique to one type of analysis, we also  
191 performed GeneWalk (Ietswaart et al., 2021) which generates a gene regulatory and GO-term  
192 network comprising all input genes. Significant functions are determined based on the similarity  
193 of vector representations for each gene to identify gene functions that are relevant to the biological  
194 context of a given experiment. We then used REVIGO (Supek et al., 2011) to remove redundant  
195 outputs and cluster related functions, and labeled each resulting cluster with an identifier that  
196 encompassed the GO terms included (**Fig. 3B**). The GeneWalk output fit remarkably well with the  
197 standard GO analysis, demonstrating that these functional groups are enriched in the  
198 downregulated transcriptional signature regardless of the methods used.

199 We next sought to define the specific genes within the transcriptional signature  
200 responsible for driving these functional enrichments. We identified the genes driving the  
201 enrichment of top GO terms and determined how many of the 5 gene sets contained these gene  
202 drivers (**Fig. 3C, Supplemental Fig. 3A**). Multiple members of the solute carrier family of genes,



203 which regulate neurotransmitter transport, were present in at least 3 of the 5 gene sets  
204 contributing to the neurotransmitter and synaptic protein trafficking gene ontology groups. We  
205 also found that many of the genes detected within at least 3 datasets for the 'Transcription' and  
206 'Response to extracellular signal' gene ontology groups identified through GeneWalk are well-  
207 established activity-dependent genes (also found in corresponding standard GO terms 'regulation  
208 of signal transduction' and 'Regulation of apoptotic process'). To directly examine whether  
209 activity-dependent genes were significantly enriched within the downregulated transcriptional  
210 signature, we utilized a previously generated set of genes upregulated in neurons upon simulation  
211 by Brain Derived Neurotrophic Factor (BDNF) for 10 minutes (Korb et al., 2015). Upon comparing  
212 these lists, we found the downregulated transcriptional signature was significantly enriched for  
213 these genes, indicating that activity-dependent genes are among those preferentially disrupted  
214 by loss of ID/ASD-linked chromatin modifiers (**Supplemental Fig. 3B**). We then confirmed these  
215 findings in an *in vivo* system by examining gene expression changes following a recall event in  
216 activated neurons using the TRAP2 mouse model (Chen et al., 2020) (**Supplemental Fig. 3C**).  
217 Finally, we used RT-qPCR to confirm downregulation of genes of interest following knockdown of  
218 the 5 ASD associated chromatin modifiers, including several activity-dependent genes (*Fos* and  
219 *Nfil3*), a solute carrier family gene (*Slc7a3*), and a calcium channel gene (*Cacng1a*)  
220 (**Supplemental Fig. 3D**). We found that each of these genes was depleted in response to  
221 knockdown of at least 4 ASD-linked chromatin modifiers.

222 We performed similar analyses to identify functional groups enriched within the  
223 upregulated transcriptional signature. Using standard GO, we found that the top 10 functional  
224 groups within this signature largely included functions relevant to cell division (**Supplemental Fig.**  
225 **3E**). While neurons are postmitotic, they use many cell cycle genes for regulation of neuronal  
226 maturation and migration (Frank and Tsai, 2009; Huang et al., 2010; Lim and Kaldis, 2013;  
227 Ohnuma and Harris, 2003). GeneWalk and REVIGO clustering revealed enriched clusters  
228 including neuronal maturation that corresponded to the cell division gene sets found by GO  
229 (**Supplemental Fig. 3F**).

230 Rather than simply starting with the transcriptional signatures defined above, we also  
231 examined the common functionally enriched groups shared between the ID/ASD-linked chromatin  
232 modifiers using a converse approach. We first performed GeneWalk on each of the 5 chromatin  
233 modifiers' up or down differentially expressed gene sets individually, then overlapped the resulting  
234 GO terms to define a set of ontology terms common to all gene sets (**Supplemental Fig. 4A**).  
235 REVIGO was used to cluster output terms and we identified each resulting cluster based on the  
236 GO terms included. We found functional groups for down regulated genes through this approach

237 that were equivalent to those found through GO and GeneWalk analysis of the ASD  
238 downregulated signature, including responses to external signaling (containing activity-dependent  
239 genes) and synaptic protein trafficking (containing neurotransmitter transport genes)  
240 (**Supplemental Fig. 4B**). Similarly, by this alternate approach, we found many analogous  
241 functional clusters present in the gene ontology terms shared by all up regulated gene lists, such  
242 as cell morphology and development, (**Supplemental Fig. 4C**). Thus, multiple functional analyses  
243 indicate that gene expression changes in response to loss of ID/ASD-linked chromatin modifiers  
244 affect critical neuronal regulatory processes such as neuronal development, synaptic trafficking,  
245 and activity-dependent gene regulation.

246

### 247 **Chromatin features of the transcriptional signature**

248

249 Having defined the functional relevance of the transcriptional signatures, we next sought  
250 to understand the features that make these genes particularly susceptible to disruption in  
251 response to knockdown of ASD-linked chromatin modifiers. We first examined their expression  
252 within control conditions and found, as expected, that they were all expressed within neurons, but  
253 otherwise include a wide-range of relative expression levels with no notable enrichment for low  
254 or high expressed genes (**Supplemental Fig. 5A-B**). Previous work has identified specific  
255 chromatin features that are shared between genes that are disrupted in neurodevelopmental  
256 disorders (Zhao et al., 2018). We therefore examined the chromatin features found within these  
257 transcriptional signatures. We used ChromHMM (Ernst and Kellis, 2017) to define the chromatin  
258 states enriched at the promoters (**Fig. 4A**) and gene bodies (**Fig. 4B**) of the downregulated  
259 transcriptional signature. We compared transcriptional signature genes with the entire genome,  
260 the genes expressed in neurons based on RNA-seq data, and all genes. As expected, the full  
261 genome was depleted of defined chromatin states relative to all gene sets examined. Interestingly,  
262 several features are distinct between the promoters of the transcriptional signature genes  
263 compared to both the promoters of all genes and the promoters of the subset of genes expressed  
264 within neurons. Mostly strikingly, promoters of the transcriptional signature genes were enriched  
265 for a bivalent state. Bivalency refers to the cooccurrence of histone modifications associated with  
266 opposing functions, and is typically defined by the presence of H3K4me3, which is associated  
267 with active gene promoters, and H3K27me3, which is associated with transcriptional repression.  
268 The synchronous presence of functionally opposing histone modifications allows for genes to be  
269 maintained in a poised state and rapidly activated in response to external signals (Bernstein et  
270 al., 2006; Voigt et al., 2013). In addition, the downregulated transcriptional signature was enriched



271 for chromatin state corresponding to strong promoter-proximal enhancers, further indicating the  
272 presence of chromatin regulatory features that allow for the robust and highly regulated activation  
273 of target genes.

274 To ensure that the enrichment of these chromatin features is not dependent on the size of  
275 the region surrounding the TSS used to define the promoter and that the analysis did not  
276 inappropriately exclude features present in broader regions, we repeated ChromHMM with an  
277 expanded region upstream of the TSS and again found similar enrichment of these chromatin  
278 states (**Supplemental Fig. 5C**). We further sought to confirm that there is an enrichment of  
279 bivalent genes within this gene signature. We used a previously defined (Court and Arnaud, 2017)  
280 set of bivalent genes and identified the subset of these that are expressed in the neuronal culture  
281 model used here. We found a highly significant overlap between these bivalent genes and the  
282 downregulated transcriptional signature (**Supplemental Fig. 5D**), confirming an enrichment of  
283 bivalent chromatin states within the genes disrupted by depletion of ASD-linked chromatin  
284 modifiers.

285 Next, we examined the chromatin states in genic regions of the downregulated  
286 transcriptional signature as above (**Fig. 4B**). We found an enrichment in polycomb-associated  
287 chromatin, reflective of the H3K27me3 present in gene bodies of bivalent genes. We also  
288 observed a decrease in the chromatin state associated with strong transcription, corresponding  
289 to the histone modification H3K36me3. This modification has multiple functions including  
290 promoting histone deacetylation to prevent run-away transcription and mediating splicing in  
291 neurons (Wagner and Carpenter, 2012; Xu et al., 2021). We also examined specific gene tracks  
292 of genes driving the functional gene ontology enrichments (**Fig. 4C-D**), specifically activity-  
293 dependent genes and genes regulating neurotransmitter transport that were present in the  
294 downregulated transcriptional signature. These genes contained bivalent domains with high  
295 H3K4me3 and H3K27me3 relative to ubiquitously expressed genes such as *Gapdh* (**Fig. 4C-F**).  
296 Interestingly, these genes also had low H3K36me3, and in genes containing proximal enhancers,  
297 such as *Nr4a1*, strong enhancer domains marked by H3K4me1 and H3K27ac.

298 We also examined chromatin states of upregulated transcriptional signature genes.  
299 Interestingly, for genic regions, many chromatin states associated with enhancers were lower in  
300 this gene set compared to all genes expressed within neurons (**Supplemental Fig. 5E**). While  
301 the down regulated signature promoter coordinates were highly enriched for bivalent domains,  
302 we found that the opposite was true at the promoters of the up regulated gene signature; this was  
303 especially apparent in the more restrictive promoter region (**Supplemental Fig. 5F**). Further, we  
304 saw robust enrichment of the active promoter state, marked by strong signals of H3K4me3,

305 H3K9ac, and H3K27ac, in both the narrow and expanded promoter regions of the up regulated  
306 signature genes (**Supplemental Fig. 5F-G**). Together, these findings suggest that genes found  
307 within the transcriptional signatures may be particularly susceptible to disruption due to distinct  
308 chromatin features. Downregulated genes in particular have features of a poised chromatin state,  
309 such as bivalent modifications at the promoter and modifications that support strong proximal  
310 enhancer function, while upregulated genes have modifications that confer strong promoter  
311 activity.

312

### 313 **Identification of the transcriptional signature in mouse models of syndromic ASD**

314

315 While the neuronal cell culture model used here to define transcriptional signatures  
316 provides a highly controlled system, its relevance to ASD may not translate in the physiological  
317 context of the brain. Therefore, to determine if the transcriptional signatures defined through a  
318 primary neuronal culture model are indicative of gene expression changes occurring within the  
319 brain, we compared these signatures to gene expression changes in multiple mouse models of  
320 NDDs. We first examined a mouse model of Rubenstein-Taybi Syndrome, which is characterized  
321 by short stature, moderate to severe ID, features of ASD, and additional abnormalities such as  
322 heart and kidney defects. It is most often caused by mutations in either of the *KAT3A* genes,  
323 *Crebbp* or *p300*, which have overlapping functions as histone acetyltransferases. *Crebbp* was  
324 one of 5 chromatin modifiers used to generate the transcriptional signatures here and thus we  
325 would hypothesize that these signatures would be present in this model if they are relevant to an  
326 *in vivo* system. We used RNA-seq of cortical tissue from a mouse model containing a double  
327 knockout of the *Kat3a* genes (*Crebbp* and *p300*) (Lipinski et al., 2020) and examined the direct  
328 overlap of differentially expressed genes to the transcriptional signatures. We found a highly  
329 significant overlap between genes downregulated in the Rubenstein-Taybi mouse model and the  
330 downregulated transcriptional signature (69 genes overlap,  $p = 1 \times 10^{-6}$ ) (**Fig. 5A**). As an alternate  
331 approach, we used GSEA to map the downregulated transcriptional signature genes onto a log2  
332 fold change ranked list of all gene expression changes in *KAT3A* knockout mice. Again, we found  
333 a highly significant enrichment through this analysis with downregulated transcriptional signature  
334 genes present within highly downregulated genes in the *KAT3A* knockout mouse (**Fig. 5B**). These  
335 analyses indicate that the transcriptional signature identified in cultured mouse neurons is also  
336 detected in related animal models.

337 We next examined whether the transcriptional signature is found in disorders that include  
338 ASD features but that are not directly caused by loss of the 5 chromatin modifiers we examined

339 here. We focused on Fragile X Syndrome (FXS), a leading genetic cause of both ID and ASD.  
340 FXS is typically caused by a repeat expansion that results in loss of expression of the *Fmr1* gene  
341 that encodes the FMRP protein. FMRP has multiple functions including regulating translation of  
342 target mRNAs which encode synaptic proteins (Darnell et al., 2011; Niere et al., 2012), as well as  
343 chromatin modifiers (Korb et al., 2017), both of which are disrupted in response to loss of FMRP.  
344 We used a mouse model of FXS, containing a knockout of the *Fmr1* gene, that recapitulates many  
345 aspects of the human disorder (Korb et al., 2017; Spencer et al., 2005, 2008). We found that both  
346 by direct overlap (**Fig. 5C**) and by GSEA analysis (**Fig. 5D**), the downregulated transcriptional  
347 signature genes were significantly enriched in genes downregulated in FXS mouse cortices (21  
348 genes overlap,  $p = 3 \times 10^{-3}$ ).

349 Lastly, we examined a mouse model of Rett Syndrome, which results in global deficits  
350 including loss of speech, movement disruptions, and autistic features. It is typically caused by  
351 mutations in the gene encoding MECP2 which binds methylated DNA and recruits protein  
352 complexes to regulate gene expression (Good et al., 2021). We examined RNA-seq data obtained  
353 from several mouse models of Rett Syndrome, including a full knockout of MECP2, a model  
354 containing a common MECP2 patient mutation, and a heterozygous deletion of MECP2 (Jiang et  
355 al., 2021; Pacheco et al., 2017). In all cases, we detected a significant overlap of differentially  
356 downregulated genes with the downregulated transcriptional signature (27 genes overlap,  $p =$   
357  $1.5 \times 10^{-7}$  in the full KO; 22 genes overlap,  $p = 8.2 \times 10^{-6}$  in the patient mutation model; 27 genes  
358 overlap,  $p = 2.2 \times 10^{-9}$  in the heterozygous model) (**Fig. 5E, Supplemental Fig. 6A, C**) and a  
359 significant enrichment of the downregulated transcriptional signature by GSEA (**Fig. 5F,**  
360 **Supplemental Fig. 6B**). Genes downregulated in the heterozygous model were not nearly as  
361 enriched for the down regulated signature as the full knockout by GSEA (**Supplemental Fig. 6D**).  
362 Together, these data demonstrate that downregulated transcriptional signature genes are  
363 disrupted in multiple animal models of ASD, even beyond those directly related to the chromatin  
364 modifiers used to define this signature in neuronal cultures.

365 Given these robust findings, we asked whether the transcriptional signature is detected in  
366 any animal model of an NDD in which transcription is disrupted in neurons, or if this signature is  
367 more closely associated with specific phenotypic outcomes such as ID or ASD. To this end, we  
368 examined mouse models of Williams Syndrome, a neurodevelopmental disorder caused by  
369 deletion of a region on chromosome 7 that encompasses 26 to 28 genes. Williams syndrome  
370 results in ID but, rather than causing ASD, patients have a hypersociability phenotype caused by  
371 deletion of transcription factors *Gtf2i* and *Gtf2ird1*. Loss of these genes leads to both ID and  
372 hypersociability in animal models (Barak et al., 2019; Dai et al., 2009; Kopp et al., 2019; Segura-

373 Puimedon et al., 2014; Young et al., 2008). Using RNA-seq data from hippocampus of a *Gtf2i*  
374 *Gtf2ird1* double knockout mouse model (Kopp et al., 2019), we found no overlapping gene  
375 expression changes with the downregulated transcriptional signature (**Fig. 5G**). To confirm that  
376 this was not solely due to the small number of differentially expressed genes, we performed pre-  
377 ranked GSEA based on log<sub>2</sub> fold change, which considers all gene expression changes and thus  
378 is not constrained by gene list size, and again found no enrichment (**Fig. H**). As another control  
379 to ensure that any lack of overlap was not just due to the specific animal model of Williams  
380 Syndrome chosen, we repeated this analysis with the complete Williams Syndrome chromosomal  
381 deletion. We again found no significant overlap with any differentially expressed genes, and no  
382 enrichment through GSEA (**Supplemental Fig. 6E-F**).

383 To determine whether the lack of enrichment of the transcriptional signature in Williams  
384 Syndrome models was specific to this syndrome, we also examined a mouse model of Kabuki  
385 Syndrome. Kabuki Syndrome results in ID and multisystem deficits including distinct craniofacial  
386 features and growth delays, but is not typically associated with ASD. It is caused by mutations in  
387 either KMT2D/MLL2, which methylates H3K4, or KDM6A, which demethylates H3K27 (Van  
388 Laarhoven et al., 2015). We examined RNA-seq data from a *Kdm6a* knockout mouse model, and,  
389 similar to Williams Syndrome models, found non-significant overlaps and enrichments by GSEA  
390 (**Fig. 5I-J**). These observations demonstrate that the transcriptional signature defined here is also  
391 disrupted in multiple mouse models of ASD, but is not observed more broadly in models of other  
392 neurodevelopmental disorders that only result in ID.

393 Next, we repeated these comparisons with the upregulated ASD gene signature. In this  
394 case, we found no significant overlap in any of the mouse models used here and only a single  
395 significant enrichment by log<sub>2</sub> fold change pre-ranked GSEA (**Supplemental Fig. 7A-P**). These  
396 data suggest that the downregulated gene set as being a more relevant signature that is detected  
397 throughout multiple models of syndromic ASD. Finally, as an additional negative control, we  
398 repeated these analyses with a neurodegenerative disorder rather than only examining  
399 neurodevelopmental syndromes. We examined RNA-seq data from multiple mouse models of  
400 Huntington's Disease which is caused by an expansion of the polyglutamine track in the  
401 Huntingtin (HTT) protein (Langfelder et al., 2016; Yildirim et al., 2019). We found either non-  
402 significant overlaps and GSEA enrichments, or in some cases, detected inverted enrichments  
403 where the downregulated gene signature overlapped and was enriched in genes upregulated in  
404 the mouse model (**Fig. 5K-L, Supplemental Fig. 8A-N**). Together, these data indicate that the  
405 downregulated transcriptional signature is disrupted in mouse models of NDDs that result in ASD,  
406 but not those that only result in ID, and is absent, or even reversed in neurodegenerative

407 disorders. Conversely, the upregulated transcriptional signature detected in neuronal cultures is  
408 not found in animal models and thus may be more specific to downstream or compensatory  
409 changes that are unique to the cell culture experimental model used.

410

### 411 **Identification of the transcriptional signature in human ASD patient iPSCs**

412

413 Given that the downregulated transcriptional signature was present in multiple animal  
414 models of ASD, we next asked whether this signature is expressed in human brain at times  
415 relevant to the development of ASD and whether these signature genes are also disrupted in  
416 human patients with ASD. To this end, we first used gene modules identified from BrainSpan data  
417 that are expressed at similar levels throughout the lifespan (Ji et al., 2016). We found that the  
418 downregulated transcriptional signature was highly enriched in gene modules 4, 6, and 36. These  
419 modules peak just before (36) or at (6) birth, or within the first months of life (4), all of which are  
420 time points highly relevant to the onset of ASD (**Supplemental Fig. 9A**). The upregulated  
421 transcriptional signature was enriched in modules 7 and 23 which are highly expressed in early  
422 development before birth (**Supplemental Fig. 9B**).

423 Next, we examined RNA-seq data from induced pluripotent stem cells (iPSCs) derived  
424 from idiopathic ASD or neurotypical patients, differentiated into neurons (DeRosa et al., 2018;  
425 Marchetto et al., 2017). Given the inherent variability in iPSCs obtained from unrelated individuals,  
426 very few significantly differentially expressed genes were detected in these datasets. We  
427 therefore used a recently developed RNA deconvolution method (Phan et al., 2020) to determine  
428 if a gene set of interest can distinguish disease state between multiple patient samples using  
429 principle component and linear regression analysis (Wright et al., 2017). Remarkably, we found  
430 that the downregulated transcriptional signature was sufficient to separate control and ASD iPSC-  
431 derived neurons based on expression of these signature genes (**Fig. 6A**). To confirm this finding  
432 wasn't specific to the dataset used, we repeated this analysis with an additional available dataset  
433 from iPSC-derived neurons from control or ASD patients (DeRosa et al., 2018). While this dataset  
434 was insufficiently powered, similar trends were observed (**Fig. 6B**). In addition, we binned patient-  
435 derived neurons into two groups based on severity of ASD using ADOS score (Lord et al., 2000),  
436 which broadly assesses social interaction and communication abilities, and found that the  
437 downregulated transcriptional signature also was able to separate these two patient populations  
438 (**Supplemental Fig. 10A**). Conversely, but fitting with findings from animal models of ASD, the  
439 upregulated transcriptional signature was not able to distinguish between control and ASD human  
440 iPSC-derived neurons (**Supplemental Fig. 10B-D**). These data indicate that the downregulated

441 transcriptional signature, defined within primary cultured neurons, was detected within human  
442 iPSC-derived neurons from idiopathic ASD patients. Together this work defines a transcriptional  
443 signature that encodes critical neuronal developmental proteins, contains unique chromatin  
444 features, and is present throughout multiple experimental models of ASD and in both mouse and  
445 human neurons.

446

## 447 **Discussion**

448

449 Here we defined transcriptional signatures that are shared in response to knockdown of 5  
450 chromatin associated proteins linked to neurodevelopmental disorders. Characterization of the  
451 function of these signatures demonstrated that these genes encoded proteins critical to neuronal  
452 development and function, with a notable enrichment in neurotransmitter transport genes and  
453 activity-dependent genes. In addition, the chromatin features associated with these signatures  
454 were enriched for specific histone modifications such as those encoding bivalent domains.  
455 Notably, the downregulated transcriptional signature was significantly enriched within several  
456 mouse models of ASD but not in mouse models of neurodevelopmental disorders that result in ID  
457 in the absence of ASD. Finally, the downregulated signature can distinguish between control and  
458 idiopathic ASD patient iPSC-derived neurons based on their transcriptional profiles.

459 A major finding that emerged from the analyses described here is that the *downregulated*  
460 transcriptional signature appears to be relevant to a wider range of models of ASD than the  
461 *upregulated* signature. We found that the downregulated signature genes map onto mouse  
462 models of neurodevelopmental disorders, particularly those linked to ASD, better than the  
463 upregulated signature genes in the context of cell culture models. The set of shared  
464 downregulated genes also was able to distinguish between control and ASD patient iPSC-derived  
465 neurons using an RNA deconvolution analysis, while upregulated genes were not, again  
466 suggesting that this downregulated gene set is the most relevant to ASD. Remarkably, these  
467 human iPSCs were generated from patients with idiopathic ASD, rather than from patients with a  
468 disorder resulting from loss of one of the 5 chromatin modifiers analyzed here. This indicates that  
469 this downregulated transcriptional signature is relevant to ASD more broadly and is not restricted  
470 to a subset of neurodevelopmental syndromes with defined genetic causes.

471 Interestingly, the downregulated transcriptional signature was detected within multiple  
472 models of syndromic ASD despite the highly divergent function of the chromatin modifiers chosen  
473 for analysis. This demonstrates that disruptions to chromatin that contribute to ASD result in  
474 similar gene expression changes regardless of the specific chromatin modifier disrupted and



475 regardless of whether the disrupted histone modifications are associated with active or repressive  
476 gene expression. In addition, the 5 chromatin modifiers examined here are also putative targets  
477 of the Fragile X Mental Retardation Protein FMRP (Darnell et al., 2011), which has several  
478 functions, including regulation of translation of target transcripts. Interestingly, FMRP target  
479 transcripts are often upregulated in FXS when FMRP is lost (Korb et al., 2017), due to its role as  
480 a translational repressor. Conversely, in the neurodevelopmental syndromes modeled here, these  
481 targets typically have loss of function mutations or deletions. Despite these opposing  
482 mechanisms, the ASD signature we defined here maps onto both cellular and animal models of  
483 FXS. This suggests that regardless of the directionality of the disruptions to chromatin modifiers,  
484 many of the same gene expression changes are observed, and, even more unexpectedly, these  
485 genes are differentially expressed in the same direction. While each individual chromatin modifier  
486 and disease model also clearly had many additional genes unique to that model, this shared  
487 signature indicates that signature genes possess common features that underlie their sensitivity.

488 While the neuronal culture model used here allows for a highly controlled comparison of  
489 the effects of depletion of multiple chromatin modifiers in parallel, it also has several limitations.  
490 By its nature, it does not allow for the examination of how these chromatin modifiers may have  
491 distinct roles at different time points. It also does not take into account very early developmental  
492 defects that may result from mutations in chromatin modifiers even before cells differentiate into  
493 neurons. Further, this system focuses only on neurons in isolation and thus does not capture the  
494 more complex results of chromatin disruptions in multiple cell types in the brain and throughout  
495 the body. However, these limitations are also what allows for the direct and precise comparison  
496 of the immediate transcriptional effects of these chromatin modifiers without the confounding  
497 factors of system-wide disruptions and lifelong developmental deficits. In addition, the finding that  
498 the transcriptional signature identified in this system can be identified within the brain of multiple  
499 mouse models of related neurodevelopmental disorders suggests despite such limitations, the  
500 data described here still provide valuable insights into the link between chromatin misregulation,  
501 transcriptional disruptions, and ASD.

502 The features that cause the disruption of the transcriptional signature genes are not yet  
503 clear. However, the enrichment of specific chromatin states in these genes indicates that histone  
504 modifications may contribute to their sensitivity to the loss of chromatin modifying proteins.  
505 Similarly, past research has uncovered unusual chromatin features that are found both in the  
506 genes whose loss leads to ASD, as well as in genes whose expression is disrupted in idiopathic  
507 ASD (Zhao et al., 2018). In our analysis, we found several chromatin features of interest such as  
508 the presence of bivalent histone modifications and differences in modifications found at

509 enhancers. Since many of the enzymes that control these modifications can be targeted by small  
510 molecule inhibitors, this finding raises the possibility of potentially targeting such modifications to  
511 reverse gene expression changes that ultimately lead to ASD. In summary, our data suggest the  
512 presence of a transcriptional signature found in multiple models of ASD and detected across  
513 multiple species. This indicates that common transcriptional disruptions may underlie the neuronal  
514 dysfunction that ultimately results in ASD and neurodevelopmental disorders.  
515  
516

517 **Materials and Methods**

518

519 **Animals:**

520 All mice used were on the C57BL/6J background, housed in a 12 hr light/dark cycle, and fed a  
521 standard diet. All experiments were conducted in accordance with and approval of IUCAC.

522

523 **Primary Neuron Culture:**

524 Cortices were dissected from E16 C57BL/6J embryos and cultured in supplemented neurobasal  
525 medium (Neurobasal (Gibco 21103-049), B27 (Gibco 17504044), Glutamax (Gibco 35050-061),  
526 PenStrep (Gibco 15140-122)) in TC-treated 6-well plates coated with 0.05 mg/mL Poly-D-Lysine  
527 (Sigma Aldrich A-003-E).

528

529 **shRNA Knockdown:**

530 At 3 DIV, neurons were treated with 0.5 uM AraC. At 5 DIV, neurons were transduced overnight  
531 with lentivirus containing an shRNA sequence targeted to one of the ALCMs. Viral media was  
532 replaced the following day (6 DIV) and neurons were cultured for 5 additional days before  
533 downstream processing at 11 DIV.

534

535 **Lentivirus Production:**

536 HEK293T cells were cultured in high glucose DMEM growth medium (Corning 10-013-CV), 10%  
537 FBS (Sigma Aldrich F2442-500ML), and 1% PenStrep (Gibco 15140-122)). Calcium phosphate  
538 transfection was performed with Pax2 and VSVG packaging plasmids. shRNAs in a pLKO.1-  
539 puro backbone were purchased from Sigma Aldrich Mission shRNA library (SHCLNG). Viral  
540 media was removed 12 hours post-transfection and collected at 24 and 48 hours later. Viral  
541 media was passed through a 0.45 µm filter and precipitated overnight with Pegit solution (40%  
542 PEG-8000 (Sigma Aldrich P2139-1KG), 1.2 M NaCl (Fisher Chemical S271-1)). Viral particles  
543 were pelleted and resuspended in 200µL PBS.

544

| Target        | Oligo sequence                                                 | Clone ID           |
|---------------|----------------------------------------------------------------|--------------------|
| <i>Ash1l</i>  | CCGGAGCTACGTCAGAGACCTAACCTCGAGGTTTAGGTCT<br>CTGACGTAGCTTTTTTG  | TRCN00003<br>04509 |
| <i>Chd8</i>   | CCGGATGACCACTTCCTCGTTTCTGCTCGAGCAGAAACGAG<br>GAAGTGGTCATTTTTTG | TRCN00002<br>41050 |
| <i>Crebbp</i> | CCGGCGCGAATGACAACACAGATTTCTCGAGAAATCTGTGT<br>TGTCATTCGCGTTTTT  | TRCN00000<br>12725 |
| <i>Crebbp</i> | CCGGCCTCACAATCAACATCTCCTTCTCGAGAAGGAGATGT<br>TGATTGTGAGGTTTTT  | TRCN00000<br>12727 |

|                   |                                                                |                    |
|-------------------|----------------------------------------------------------------|--------------------|
| <i>Ehmt1</i>      | CCGGGCGCTGGCTATATGGAAGTTTCTCGAGAACTTCCAT<br>ATAGCCAGCGCTTTTTG  | TRCN00000<br>86070 |
| <i>Nsd1</i>       | CCGGGAGCTCTCGTACAGATCATTACTCGAGTAATGATCTG<br>TACGAGAGCTCTTTTTG | TRCN00004<br>13536 |
| <i>Luciferase</i> | CCGGGCGCTGAGTACTTCGAAATGTCCTCGAGGACATTTTCA<br>AGTACTCAGCGTTTTT | SHC007             |

545

546 **RNA isolation:**

547 Total RNA was collected from each transduction at 11 DIV for both RT-qPCR and RNA-seq.

548 RNA for RT-qPCR was isolated from neurons using Qiagen RNeasy mini kit (74004) or Zymo

549 Quick-RNA miniprep kit (R1054).

550

551 **Western blotting:**

552 After 10 DIV, neurons were lysed in RIPA (25 mM Tris pH 7.6, 150 mM NaCl, 1% NP-40, 1%

553 sodium deoxycholate, 0.1% SDS), supplemented by protease inhibitor (Roche 04693124001),

554 phosphatase inhibitor (Roche 04906837001), 1mM DTT, 1mM PMSF. Lysates were mixed with

555 5X Loading Buffer (5% SDS, 0.3 M Tris pH 6.8, 1.1 mM Bromophenol blue, 37.5% glycerol),

556 boiled for 10 minutes, sonicated for 5 minutes, and cooled on ice. Sample protein was resolved

557 by 16% Tris-Glycine, 4-20% Tris-Glycine, or 3-8% Tris-Acetate SDS-PAGE, followed by transfer

558 to a 0.45µm PVDF membrane (Sigma Aldrich IPVH00010) for immunoblotting. Membranes

559 were blocked for 1 hour in 5% BSA in TBST and probed with primary antibody overnight at 4C.

560

| Target               | Supplier (Cat No.)                      | Working dilution |
|----------------------|-----------------------------------------|------------------|
| ASH1L                | Bethyl Laboratories (A301-749A)         | 1:1000           |
| CHD8                 | Cell Signaling Technologies<br>(77694S) | 1:1000           |
| CREBBP               | Cell Signaling Technologies<br>(7389S)  | 1:1000           |
| EHMT1                | Thermo Fisher Scientific<br>(PA5114733) | 1:1000           |
| TUBULIN              | Abcam (ab18207)                         | 1:5000           |
| HRP Goat anti-Rabbit | Abcam (ab6721)                          | 1:10000          |
| HRP Sheep anti-Mouse | Millipore Sigma (GENA931-1ML)           | 1:10000          |

561

562 **RT-qPCR**

563 cDNA was prepared with High-Capacity cDNA Reverse Transcription Kit (Applied Biosystems

564 4368813) and quantitative PCR was performed with Power SYBR Green PCR Master Mix

565 (Applied Biosystems 4367659).

566 Data was analyzed using the Common Base Method developed by Ganger et al. 2017.  
567 Reported statistics were calculated by student's T-test (two-tailed, heteroscedastic) based on  
568 primer efficiency-weighted deltaCT values (ACLM- vs. Luciferase-infected). Reported bar graph  
569 values represent the square root of the relative expression ratio for a given gene of interest.

570

| Target                | Sequence                |
|-----------------------|-------------------------|
| <i>Gapdh</i> Forward  | AACTCCCTCAAGATTGTCAGCAA |
| <i>Gapdh</i> Reverse  | GGCATGGACTGTGGTCATGA    |
| <i>Ash1L</i> Forward  | CCAACACCTGGTTTCCTGAT    |
| <i>Ash1L</i> Reverse  | TCCTCCTTCCAAGTCTTCCA    |
| <i>Chd8</i> Forward   | CACTGAACTTCCCAAAGAATCCA |
| <i>Chd8</i> Reverse   | GGTGGGCTGAGTGGTATAATCAT |
| <i>Crebbp</i> Forward | GGCTTCTCCGCGAATGACAA    |
| <i>Crebbp</i> Reverse | GTTTGGACGCAGCATCTGGA    |
| <i>Ehmt1</i> Forward  | GAACAGGAGTCTCCCGACAC    |
| <i>Ehmt1</i> Reverse  | GGGCTGTCAGTCTTCCCTC     |
| <i>Nsd1</i> Forward   | TCCGGTGAATTTAGATGCCTCC  |
| <i>Nsd1</i> Reverse   | CGGTAAGTGCATAGTACACCCAT |
| <i>Cacng1</i> Forward | GAGACACAGAGTACGGGAGC    |
| <i>Cacng1</i> Reverse | CACTGTCTGCCTTGGAGCAA    |
| <i>Nfil3</i> Forward  | CAGTGCAGGTGACGAACATT    |
| <i>Nfil3</i> Reverse  | TTCCACCACACCTGTTTTGA    |
| <i>Slc7a3</i> Forward | ATTTGCTTTCTCCGAGGGCA    |
| <i>Slc7a3</i> Reverse | AGGATGCTAGCTAGGTTCTCAA  |
| <i>Fos</i> Forward    | CCGACTCCTTCTCCAGCAT     |
| <i>Fos</i> Reverse    | TCACCGTGGGGATAAAGTTG    |
| HIV-PSI Forward       | GGACTCGGCTTGCTGAAG      |
| HIV-PSI Reverse       | CCCCCGCTTAATACTGACG     |

571

572

573 **RNA-seq:**

574 Libraries were generated using the Illumina TruSeq Stranded mRNA Library Prep Kit (Illumina  
575 20040534). Libraries were sequenced on an Illumina NextSeq 500/550 and reads (75-basepair  
576 single-end) were mapped to Mus Musculus genome build mm10 with Salmon, The R package,

577 DESeq2 (v3.14), was used to perform differential gene expression analysis. IGV tools (2.11.3)  
578 was used to generate genome browser views.

579

## 580 **Statistical analyses:**

581

### 582 *Overlap analysis:*

583 R was used to calculate pairwise overlaps of differentially expressed gene lists and their  
584 corresponding significance values. For these analyses, a background expressed gene list was  
585 defined to be those genes in the Luciferase versus Uninfected DESeq2 comparison with an  
586 official gene symbol and a baseMean value greater than 5. InveractiveVenn was used to  
587 generate 5-way gene list Venn diagrams (Heberle et al., 2015). Multiple testing correction based  
588 on a 5% False Discovery Rate threshold using the Benjamini-Hochberg method (Benjamini and  
589 Hochberg, 1995).

590

### 591 *Gene Ontology analysis:*

592 HOMER (v4.11) was used to perform gene ontology analysis using default parameters.  
593 GeneWalk (v1.5.3) was run using Python 3.9 using default values. According default cutoffs,  
594 GeneWalk results were filtered for global\_padj and gene\_padj values less than 0.1 (Ietswaart et  
595 al., 2021). Revigo was used to remove redundant terms and to generate a 2-dimensional scatter  
596 based on semantic similarity of retained terms. Revigo input parameters used were: size of  
597 resulting list – tiny; remove obsolete GO terms – yes; species – mus musculus; semantic  
598 similarity measure – Resnik. Python 3.9 was used for processing of Revigo outputs with  
599 semantic similarity scatters clustered iteratively using Kmeans (sklearn.cluster.KMeans; default  
600 parameters; 2-15 clusters). Resulting clusters were assessed on the basis of silhouette scores  
601 and by manually judging the biological similarity of ontology terms placed within the same  
602 clusters.

603

### 604 *ChromHMM analysis:*

605 The chromatin state segmentation BED file containing coordinates of annotated chromatin  
606 states (Gorkin et al., 2020) was used in running ChromHMM with parameters: java -mx400M  
607 ChromHMM OverlapEnrichment inputsegment inputcoorddir outfileprefix. Input coordinates for  
608 mm10 genic regions were generated via the UCSC Table Browser (group: Genes and gene  
609 predictions; track: GENCODE VM11 (Ensembl 86); table: basic). Mouse transcript names were  
610 converted to corresponding mouse Ensembl IDs using the R package biomaRt. Genic



611 coordinates were obtained by querying the a biomaRt mart object (ensembl) for 'start\_position'  
612 and 'end\_position' and filtering for genes of interest. Promoter coordinates were generated  
613 using the R package TxDb.Mmusculus.UCSC.mm10.knownGene ('knownGene'). The flank  
614 function from the GenomicRanges R package was used to generate coordinates 500 and 2000  
615 base pairs upstream of TSS sites listed in knownGene. The cds function from GenomicRanges  
616 was used to get cds coordinates from knownGene. Promoter regions at -500 and -2000 base  
617 pairs were trimmed if they intersected a genic region.

618

#### 619 *GSEA:*

620 The R package fgsea was used to perform pre-ranked gene set enrichment analysis based on  
621 log2FoldChanges obtained from DESeq2 differential expression analysis. The ASD Down and  
622 ASD Up gene lists were used as comparison gene sets.

623

#### 624 *RNA deconvolution*

625 RNA deconvolution analysis was performed as described in Phan et al. 2020. Code was  
626 obtained from the Lieber Institute Github page ([https://github.com/LieberInstitute/PTHS\\_mouse](https://github.com/LieberInstitute/PTHS_mouse)).  
627 Variance Stabilized Transformation (DESeq2 package) was used to scale gene expression  
628 values which were used to compare read counts between ASD and control samples. Linear  
629 regression analysis was performed on transformed gene expression values, modeling the effect  
630 of diagnosis while adjusting for age and a number of quality surrogate variables (qSVs), which  
631 help correct for additional confounds in the data and are determined by the num.sv() function in  
632 the sva R package (Jaffe et al., 2017). Given limited access to metadata, we performed this  
633 analysis after removing variation due to age of the patient. The optimal number of PCs for  
634 Marchetto et al., 2017 diagnosis and ASD-severity comparisons were determined to be 7 and 4,  
635 respectfully. For DeRosa et al. 2018, the subset of induced-neurons cultured for 35 DIV was  
636 used. The optimal number of PCs for diagnosis comparisons was determined to be 4.

637

#### 638 **Data availability:**

639

640 All genome-wide sequencing data is available under accession number [GSE193663](#).

641

642

643 **Table 1**

644

| Gene ID       | Function                         | Target (mark)                                       | Associated Syndrome                        | ASD | ID | Ms |
|---------------|----------------------------------|-----------------------------------------------------|--------------------------------------------|-----|----|----|
| <i>Ash1L</i>  | Histone lysine methyltransferase | H3K36 (me3)                                         | Emerging MCA/ID Disorder                   | X   | X  | X  |
| <i>Chd8</i>   | Chromodomain helicase            | Chromatin remodeler; recruitment of other complexes | Autism 18; Charge Syndrome                 | X   | X  | X  |
| <i>Crebbp</i> | Histone acetyltransferase        | Promiscuous H3 lysines (Ac)                         | Rubinstein-Taybi Syndrome                  | X   | X  | X  |
| <i>Ehmt1</i>  | Histone lysine methyltransferase | H3K9 (me1/me2)                                      | Kleefstra Syndrome                         | X   | X  | X  |
| <i>Nsd1</i>   | Histone lysine methyltransferase | H3K36 (me2)                                         | Soto Syndrome; Beckwith-Wiedemann Syndrome | X   | X  | X  |

645

646

647 **Table 1. Candidate proteins.** Functions and associated disorders of 5 chromatin modifiers  
648 chosen for analysis. All proteins have distinct functions in regulating histones. Mutation or  
649 deletion of all candidates results in well-defined neurodevelopmental syndromes that include  
650 features such as intellectual disability (ID) and Autism Spectrum Disorder (ASD). Mouse (Ms)  
651 column indicates a mouse models show expected phenotypes.

652

653

654

655

656

657

658

659

660

661

662

663

664

665

666 **Figure 1**

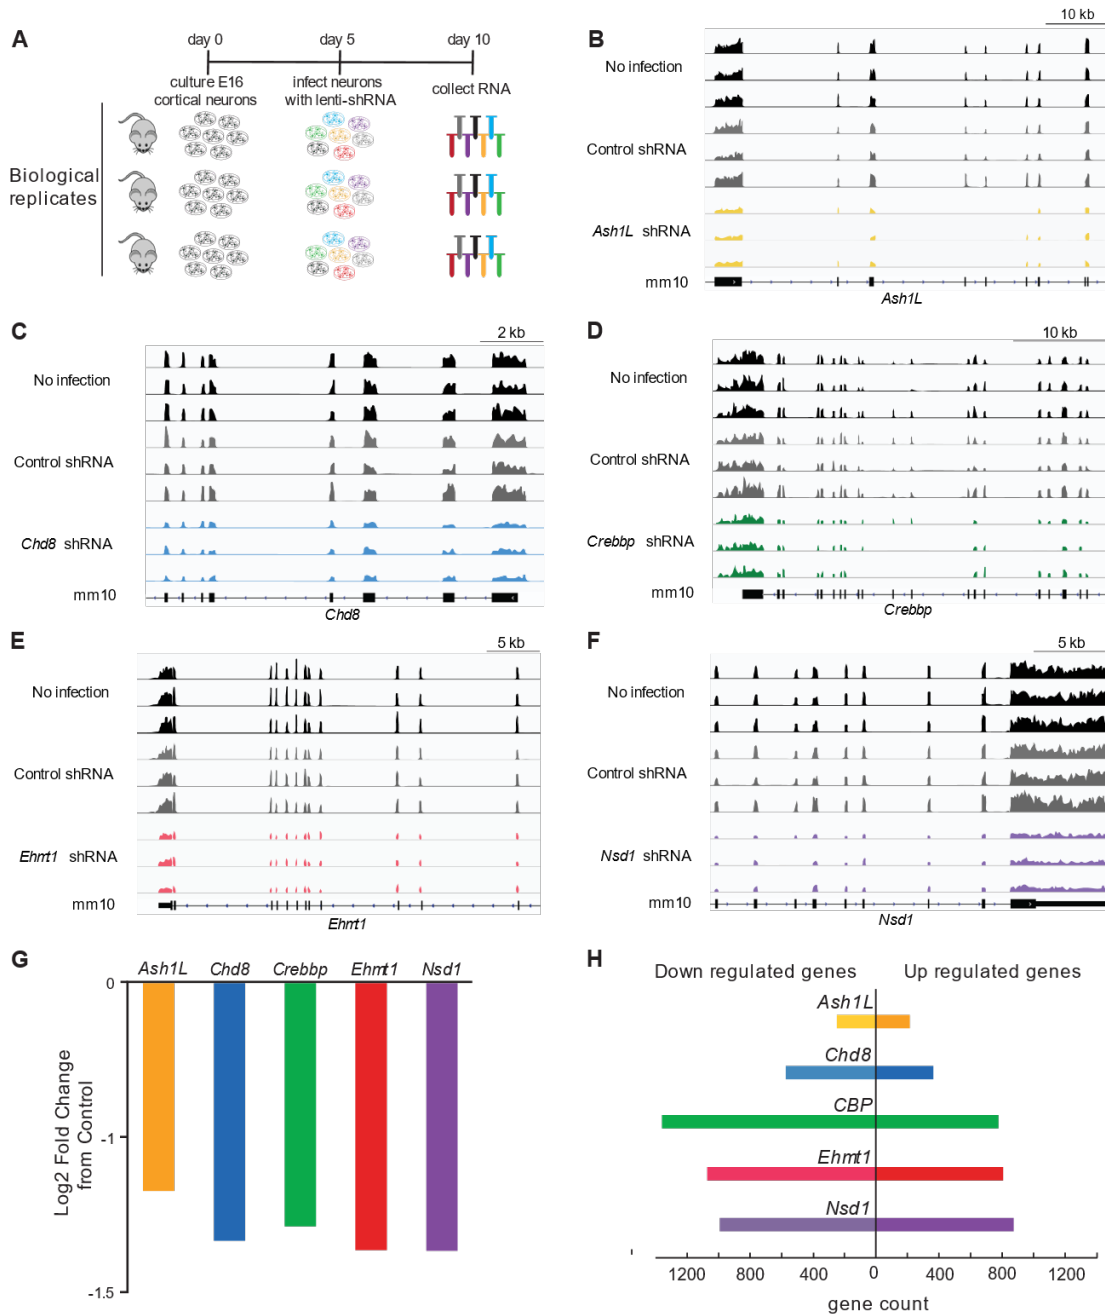

667

668

669 **Figure 1. System for comparison of gene expression profiles of chromatin modifiers. (A)**

670 Primary neuronal culture system used to analyze gene expression changes after knockdown of

671 ASD-linked chromatin modifiers. (B-F) Gene tracks of chromatin modifier genes after

672 knockdown. (G) Fold change in transcript expression of targets from RNA-seq data. (H) Number

673 of genes down and upregulated by knockdown of 5 ASD-linked chromatin-associated proteins.

674 N=3 replicates.

675 **Figure 2**

**A**

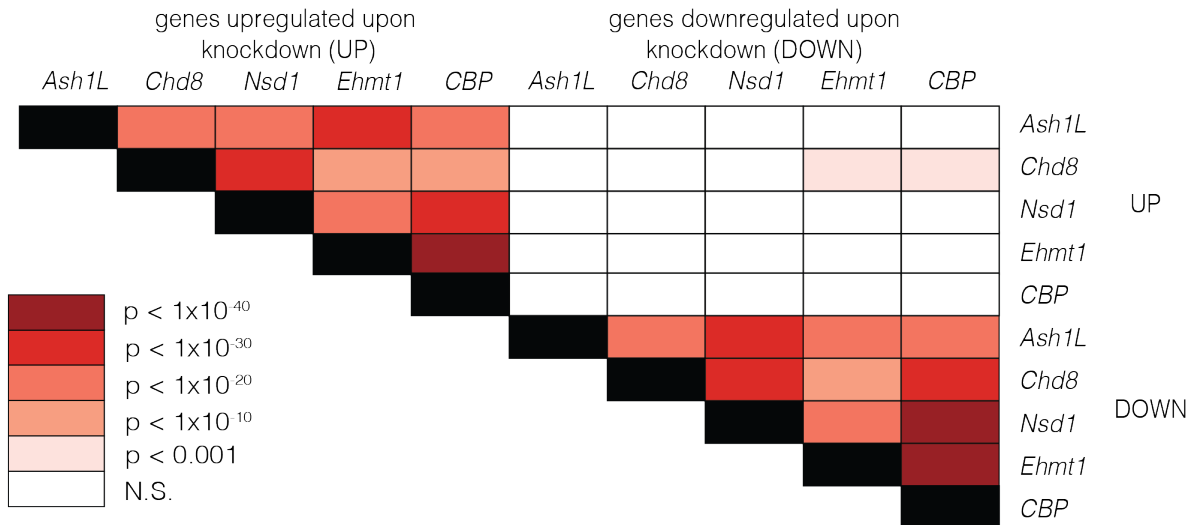

**B**

Downregulated

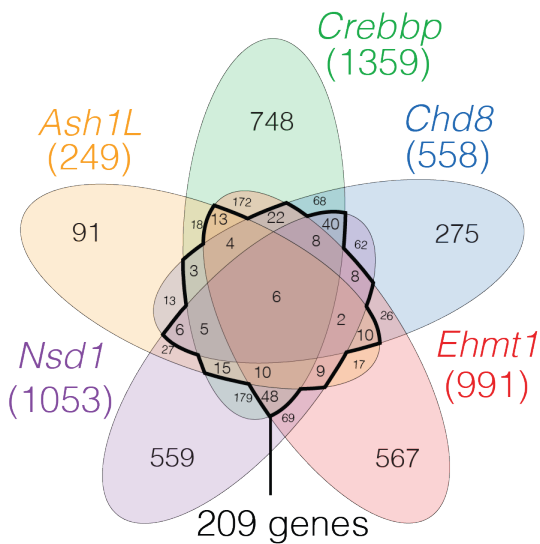

**C**

Upregulated

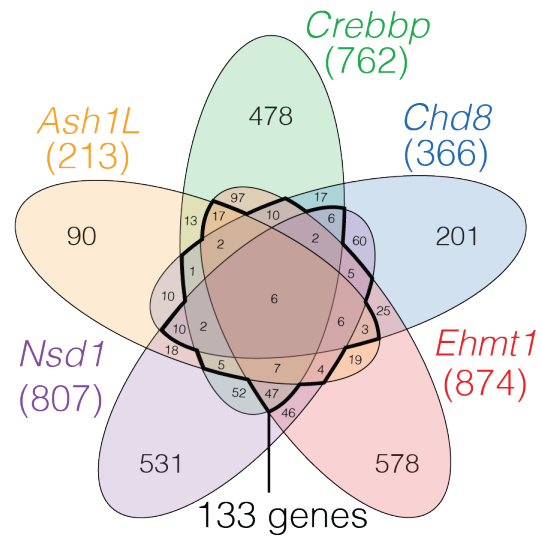

676

677

678 **Figure 2. Overlap of genes that are differentially expressed following knockdown of ASD-**

679 **linked chromatin modifiers.** (A) Significance of overlap of down and upregulated genes after

680 knockdown. Heatmap indicates significance level by hypergeometric testing. (B-C) Overlap of

681 genes that are downregulated (B) or upregulated (C) by multiple targets. Dark line indicates

682 subset of genes differentially expressed in at least 3 of 5 gene sets. Overlap significance based

683 on hypergeometric tests.

684 **Figure 3**  
685

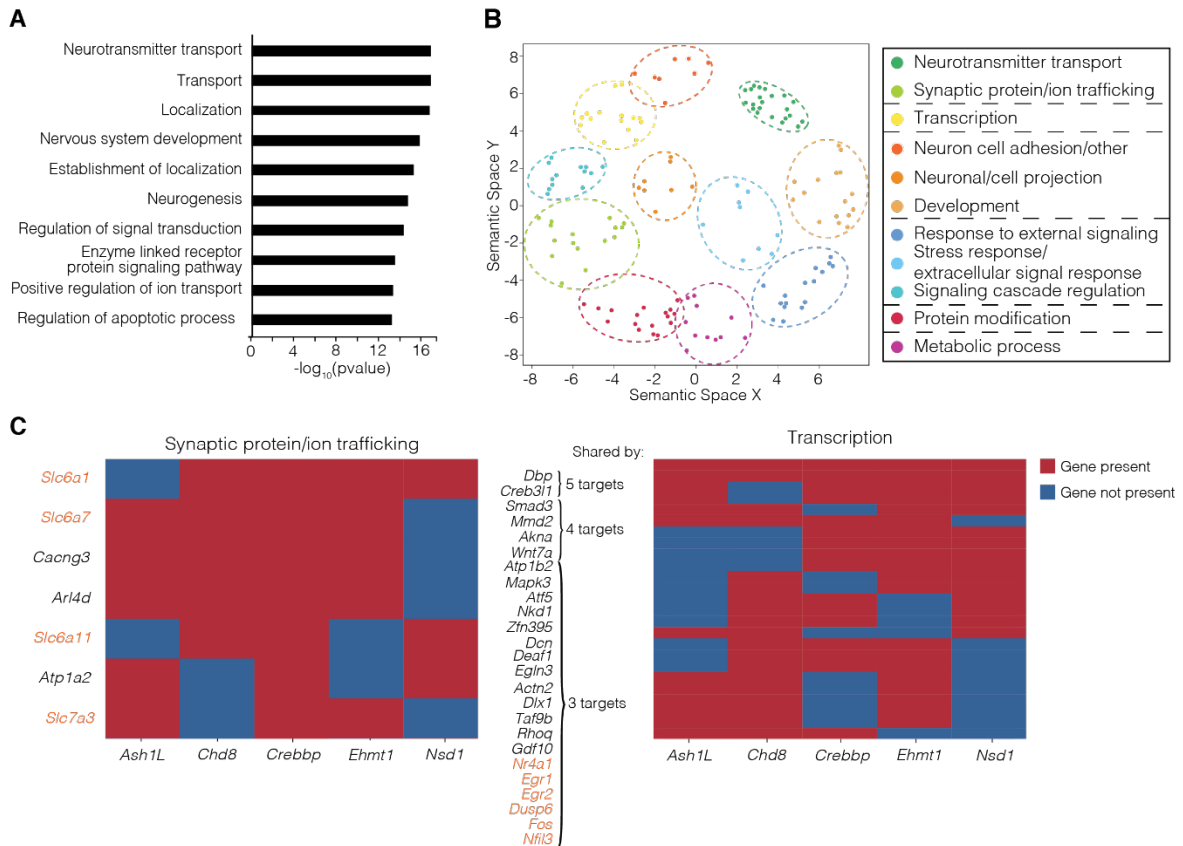

686

687

688 **Figure 3. Function of downregulated transcriptional signature genes.** (A) Gene Ontology  
689 analysis of downregulated transcriptional signature gene function. (B) GeneWalk analysis  
690 followed by Revigo clustering of downregulated transcriptional signature genes. (C) Genes  
691 contributing to main gene ontology clusters that are differentially expressed after knockdown of  
692 3 or more ASD-linked chromatin modifiers. Solute-carrier family and activity dependent genes  
693 are shown in orange.

694

695 **Figure 4**

696

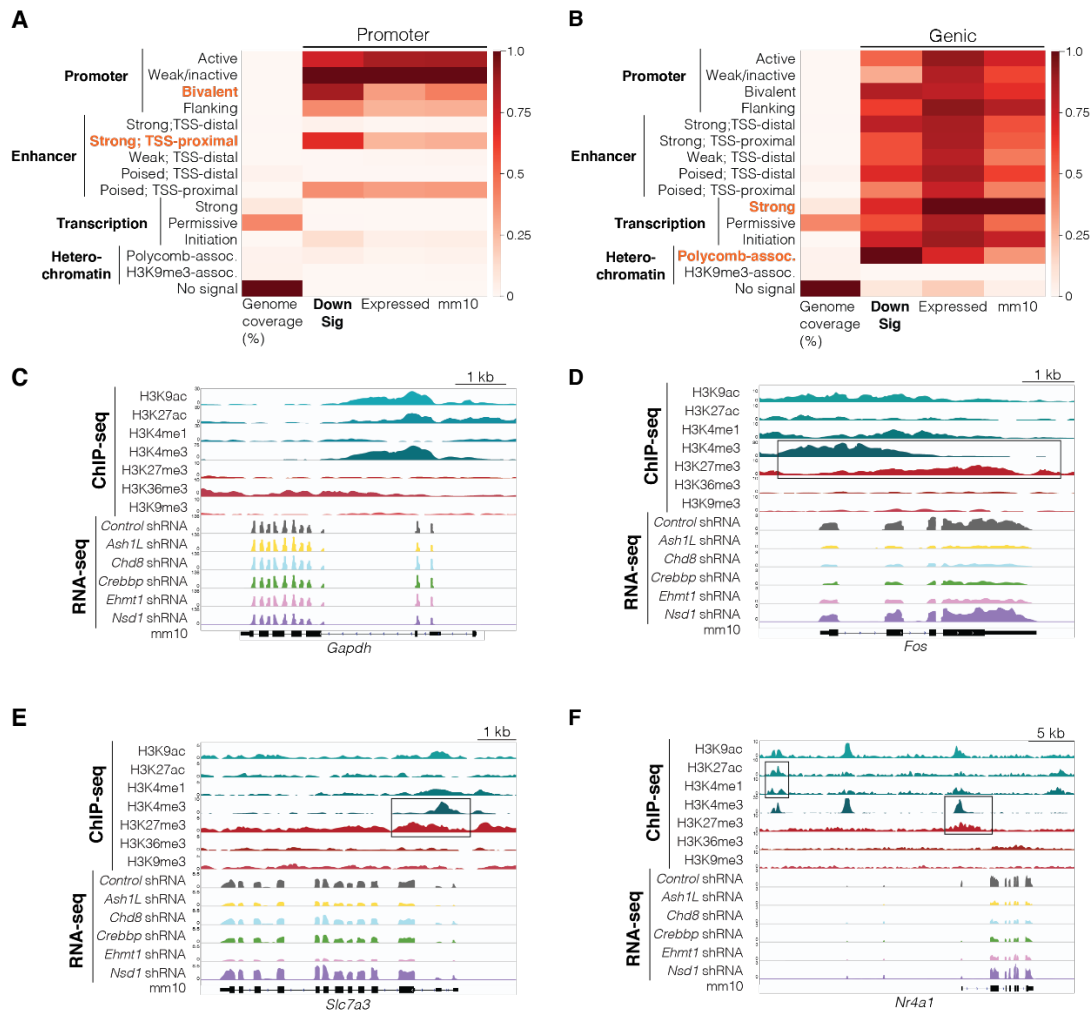

697

698

699 **Figure 4. Chromatin states in transcriptional signature genes.** (A) ChromHMM analysis of

700 promoter (500 base pairs upstream of transcription start site) of downregulated transcriptional

701 signature genes. (B) ChromHMM analysis of genic regions of transcriptional signature genes.

702 (C) Gene track of a control gene, *Gapdh*, that is not regulated by ASD-linked chromatin

703 modifiers. (D-F) Gene tracks of downregulated transcriptional signature genes *Fos* (D), *Slc7a3*

704 (E), and *Nr4a1* (F) that have bivalent domains (high H3K4me3 and high H3K27me3), low

705 H3K36me3, and strong proximal enhancer site (H3K4me1 and H3K27ac peaks upstream of

706 *Nr4a1*) typical of downregulated transcriptional signature genes. Boxes highlight these

707 chromatin states. TSS indicates transcription start site. Expressed indicates genes expressed in

708 neuronal culture system. Displayed heatmaps represent overlap enrichment output values

709 range-normalized by column.



710  
711

**Figure 5**

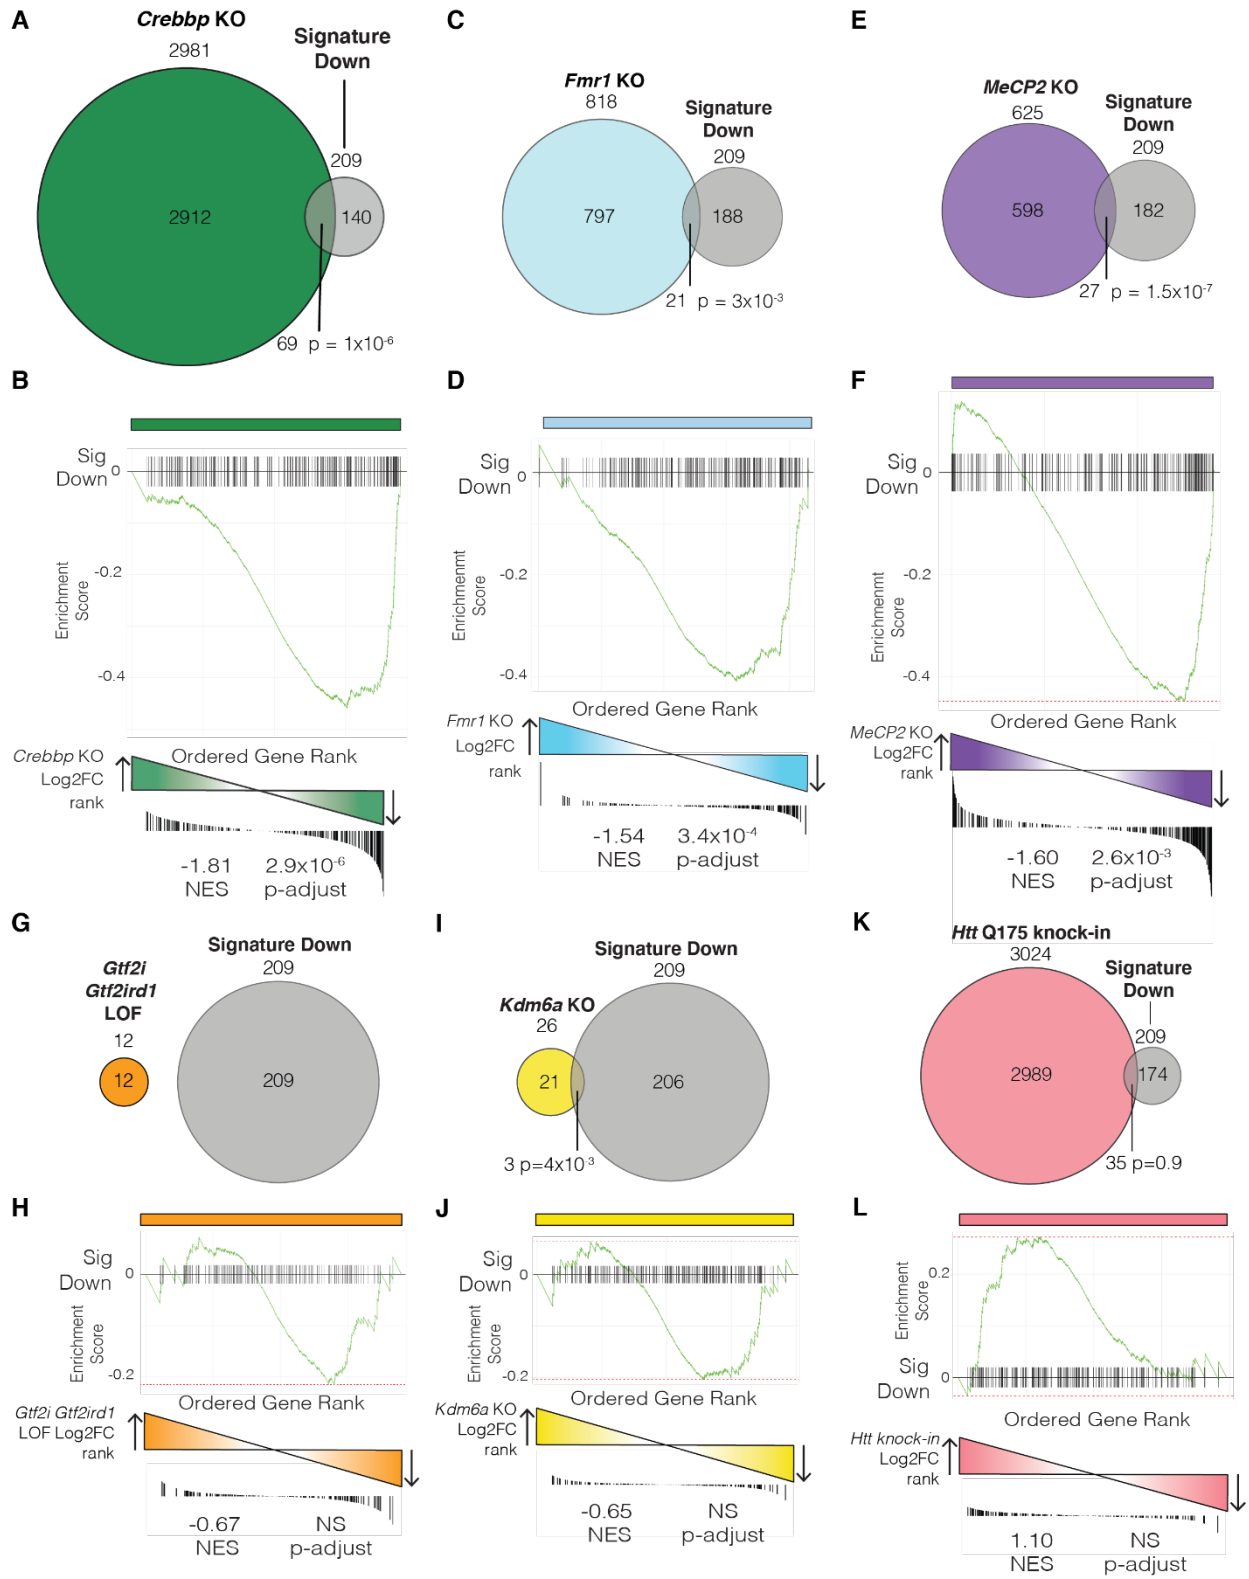

712

713 **Figure 5. Identification of transcriptional signature in mouse models of ASD.** (A-B)  
714 Overlap (A) and GSEA (B) analysis of downregulated transcriptional signature compared to  
715 differentially expressed genes in a *Kat3a* double KO mouse model of Rubinstein-Taybi  
716 Syndrome. (C-D) Overlap (C) and GSEA (D) analysis of downregulated transcriptional signature  
717 compared to differentially expressed genes in a *Fmr1* KO mouse model of FXS. (E-F). Overlap  
718 (E) and GSEA (F) analysis of downregulated transcriptional signature compared to differentially  
719 expressed genes in a *MeCP2* KO mouse model of Rett Syndrome. Overlap (G) and GSEA (H)  
720 analysis of downregulated transcriptional signature compared to differentially expressed genes  
721 in a *Gtf2i* and *Gtf2ird* double LOF mouse model of Williams Syndrome. (I-J) Overlap (I) and  
722 GSEA (J) analysis of downregulated transcriptional signature compared to differentially  
723 expressed genes in a *Kdm6a* KO mouse model of Kabuki Syndrome. (K-L) Overlap (K) and  
724 GSEA (L) analysis of downregulated transcriptional signature compared to differentially  
725 expressed genes in a *HTT* Q175 repeat knock-in mouse model of Huntington's Disease.  
726 Overlap significance based on hypergeometric tests. NES indicates normalized enrichment  
727 score. LOF indicates loss of function.  
728

729 **Figure 6**

730

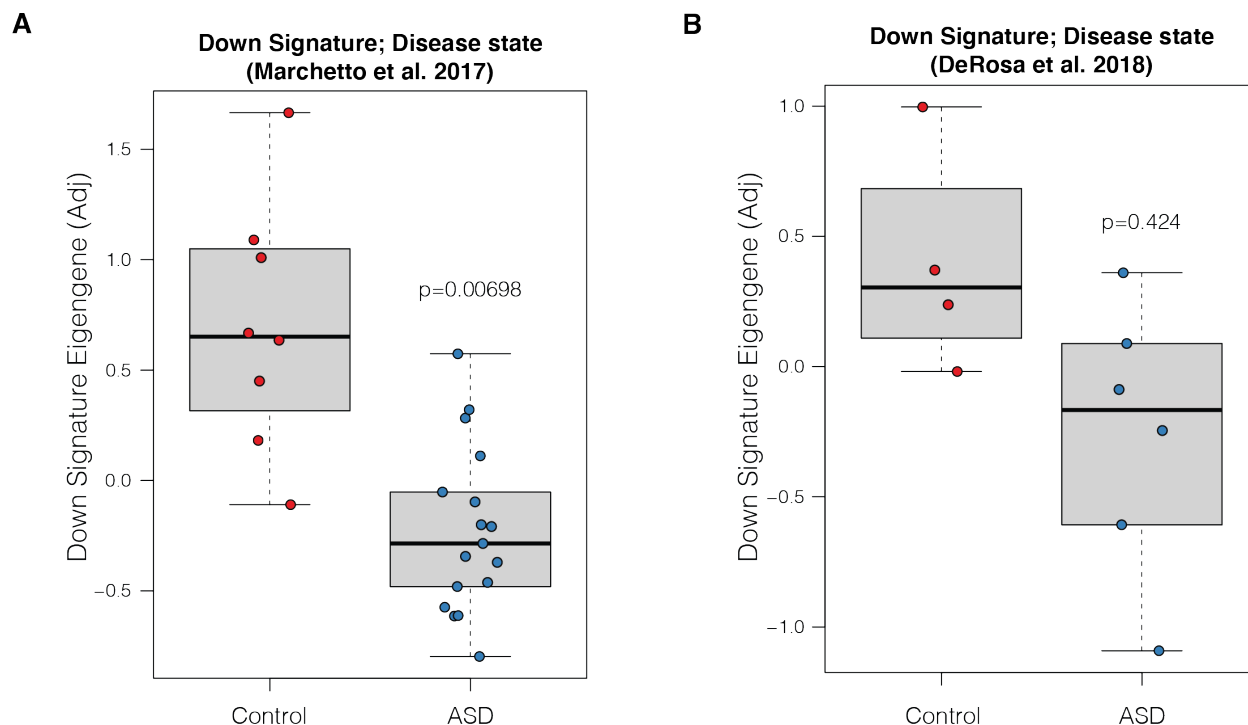

731

732

733 **Figure 6. Identification of transcriptional signature in human iPSC-derived neurons with**

734 **idiopathic ASD.** (A) RNA deconvolution analysis of control and idiopathic ASD patient iPSC

735 derived neurons (Marchetto et al. 2017) using the downregulated transcriptional signature

736 (linear regression for disease state,  $p=0.00698$ ).

737 (B) RNA deconvolution analysis of control and idiopathic ASD patient iPSC derived neurons from an additional dataset (DeRosa et al. 2018)

738 using the downregulated transcriptional signature (linear regression for disease state,  $p=0.424$ ).

739 Control indicates neurons derived from neurotypical human iPSCs. 'Adj' indicates adjusted.

740

741 **Supplemental Figure 1**

742

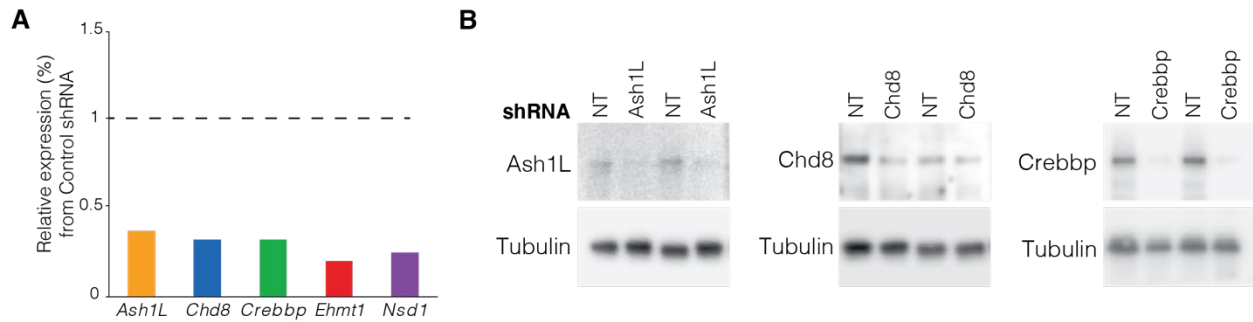

743

744

745 **Supplemental Figure 1. Confirmation of knockdown of target chromatin modifiers.** (A) RT-

746 qPCR analysis of knockdown after infection with shRNA lentiviral vectors. N = 3. (B) Western

747 blot analysis of protein levels of ASD-linked chromatin modifiers targeted by shRNA lentiviruses.

748 NT indicates non-targeting control lentivirus infection.

749

750 **Supplemental Figure 2**

751

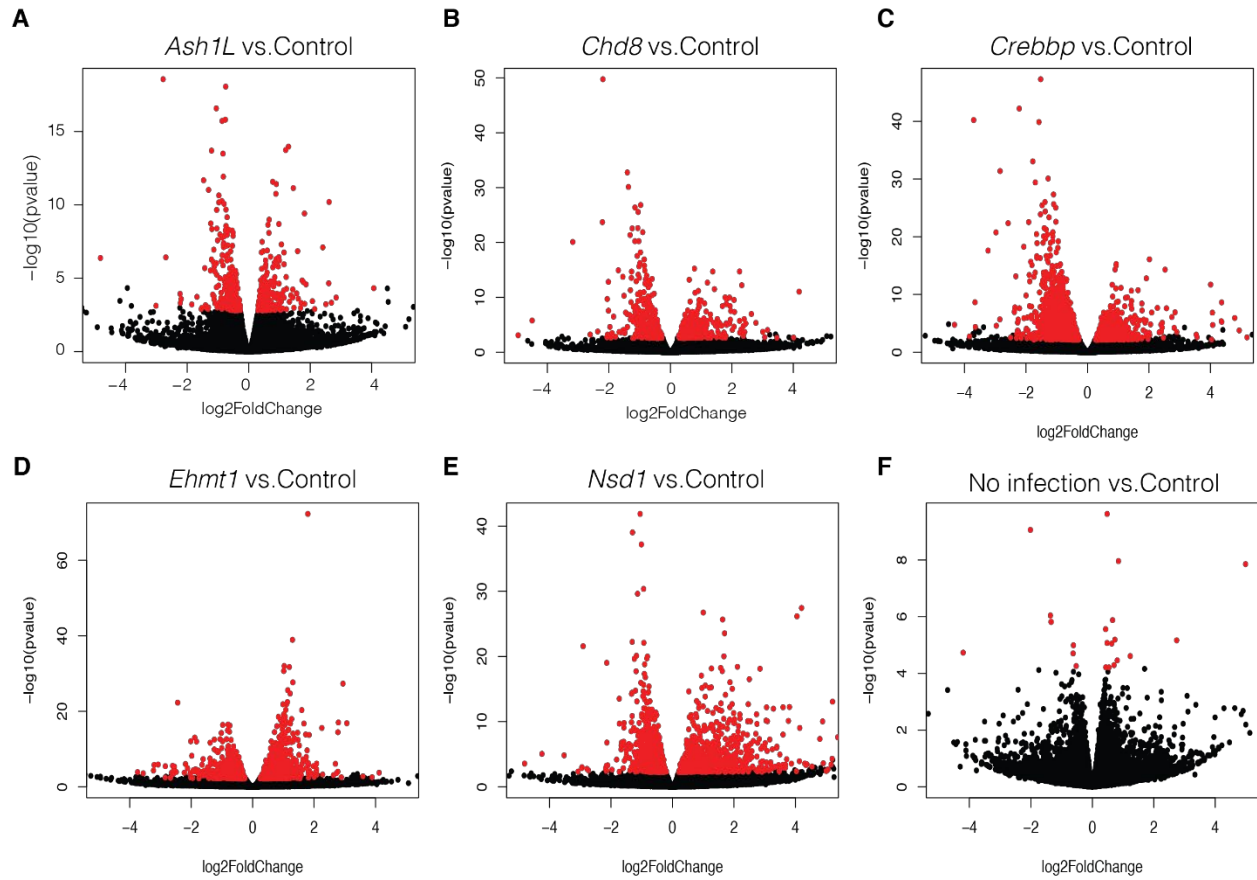

752

753

754 **Supplemental Figure 2. Differential gene expression in response to knockdown of ASD-**

755 **linked chromatin modifiers.** Volcano plot of differential gene expression after knockdown of 5

756 ASD-linked chromatin-associated proteins by infection of shRNA lentivirus compared to non-

757 targeting control lentivirus. N=3. Red indicates significance at an adjusted p-value of 0.05 by

758 DESeq2.

759

760 **Supplemental Figure 3**

761

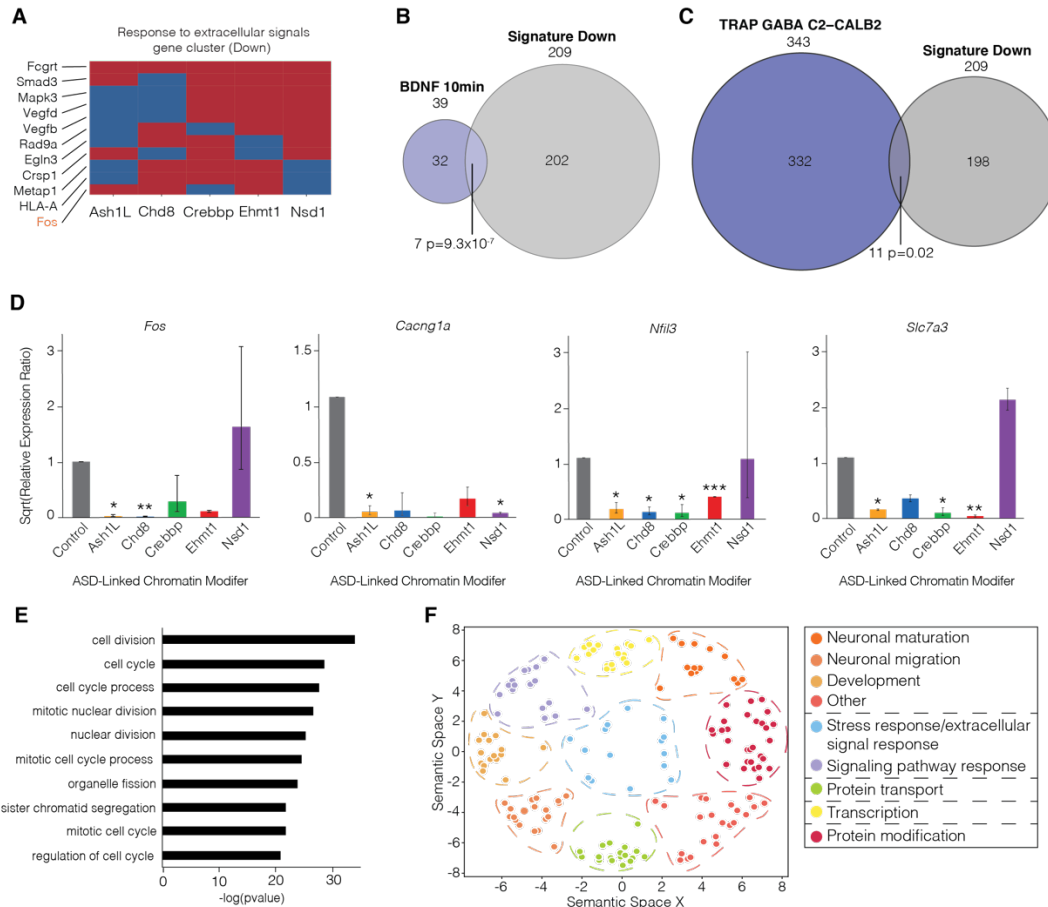

762

763 **Supplemental Figure 3. Function of down and upregulated transcriptional signature**

764 **genes.** (A) Genes contributing to ‘Response to extracellular signals’ cluster that are differentially

765 expressed after knockdown of 3 or more ASD-linked chromatin modifiers. Activity dependent

766 genes shown in orange. (B) Overlap of downregulated transcriptional signature genes with

767 genes induced in response to a 10-minute BDNF stimulation in primary cultured neurons. (C)

768 Overlap of downregulated transcriptional signature genes with genes induced in a fear

769 conditioning memory paradigm in neurons activated in a TRAP2 mouse model. (D) RT-qPCR

770 validation of genes that are disrupted by at least 3 of the 5 ASD-linked chromatin modifiers and

771 that contribute to gene ontology clusters. N=3. (E) Gene Ontology analysis of upregulated

772 transcriptional signature gene function. (F) GeneWalk analysis followed by Revigo clustering of

773 upregulated transcriptional signature genes. Overlap significance determined by hypergeometric

774 tests. RT-qPCR statistics determined by t-test of means of CT values normalized to *Gapdh*

775 relative to control infection, \* indicates <0.05, \*\* indicates <0.01, \*\*\* indicates <0.001. BDNF

776 indicates Brain Derived Neurotrophic Factor.

777

778 **Supplemental Figure 4**  
779

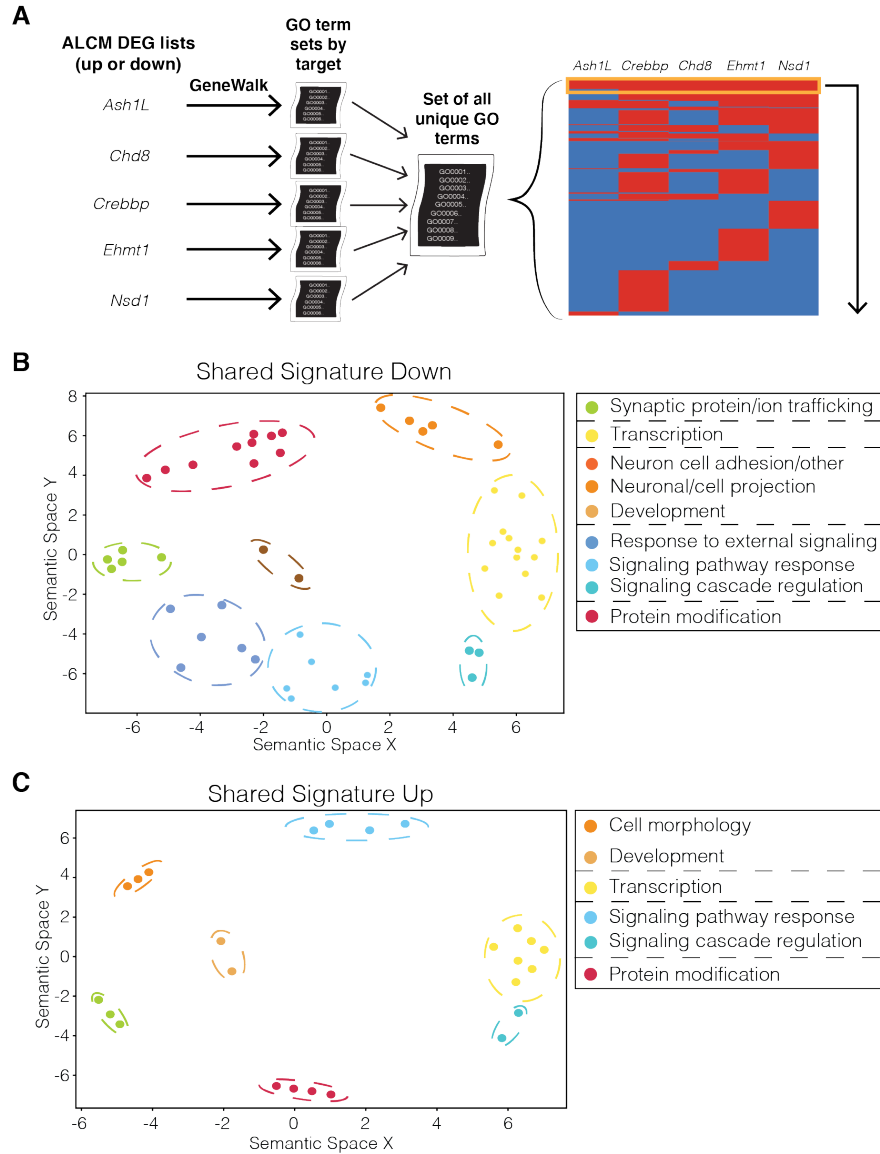

780

781 **Supplemental Figure 4. Function of down and upregulated genes for each ASD-linked**  
782 **chromatin modifier.** (A) Analysis schematic of GeneWalk performed on each separate set of  
783 differentially expressed genes following knockdown of 5 ASD-linked chromatin modifiers  
784 (ALCM). GO terms were then overlapped to find common functions and clustered by REVIGO.  
785 (B) Analysis of separate GeneWalk analysis and overlapping outputs of genes downregulated  
786 following knockdown of ASD-linked chromatin modifiers. (C) Analysis of separate GeneWalk  
787 analysis and overlapping outputs of genes upregulated following knockdown of ASD-linked  
788 chromatin modifiers. DEG indicates differentially expressed genes following knockdown of an  
789 ALCM target compared to non-targeting control lentiviral infection.



790 **Supplemental Figure 5**

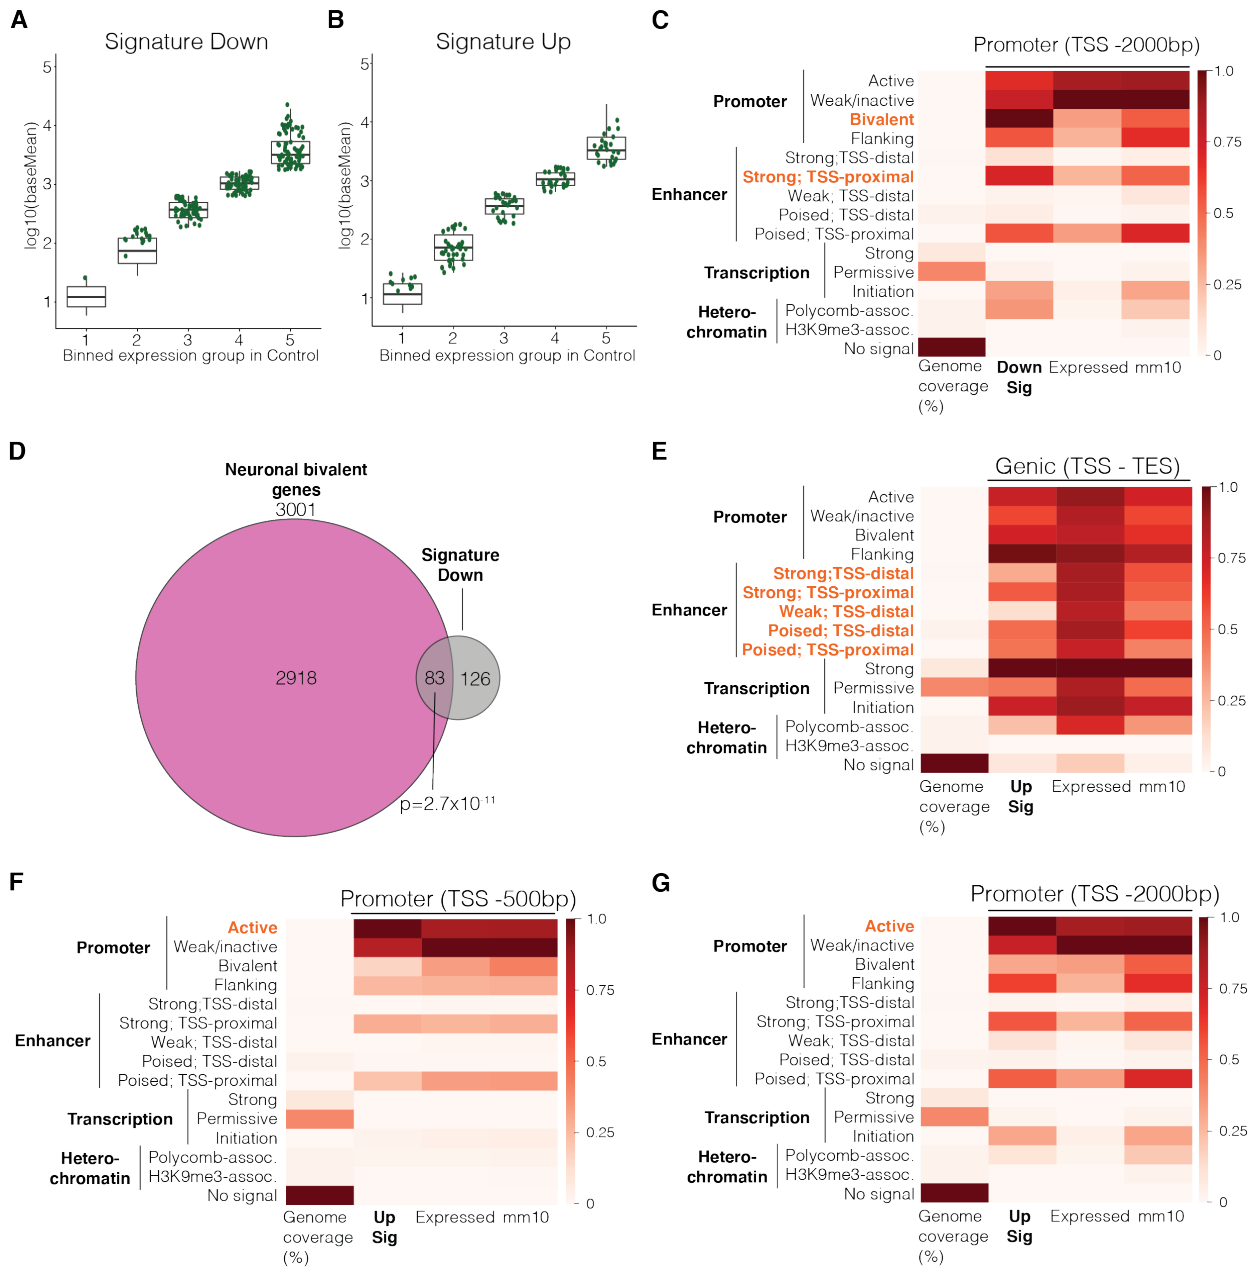

791

792

793 **Supplemental Figure 5. Chromatin states in transcriptional signature genes. (A-B)**

794 Expression of all genes from control neurons binned into 5 equal groups with down (A) and up

795 (B) ASD transcription signature genes shown in green. (C) Downregulated transcriptional

796 signature genes overlap with bivalent genes expressed in neurons. Overlap significance based

797 on a hypergeometric test. (D) ChromHMM analysis of promoter region of downregulated

798 transcriptional signature genes using an expanded upstream region up to 2000 basepairs

799 upstream of the TSS. (E) ChromHMM analysis of genic regions of upregulated transcriptional

800 signature genes. (F) ChromHMM analysis of the promoter region of upregulated transcriptional  
801 signature genes up to 500 base pairs upstream of the TSS. (G) ChromHMM analysis of the  
802 promoter region of upregulated transcriptional signature genes using an expanded upstream  
803 region up to 2000 base pairs upstream of the TSS. TSS indicates transcription start site. TES  
804 indicates transcription end site. Expressed indicates genes expressed in neuronal culture  
805 system. Displayed heatmaps represent overlap enrichment output values range-normalized by  
806 column.  
807

808 **Supplemental Figure 6**

809

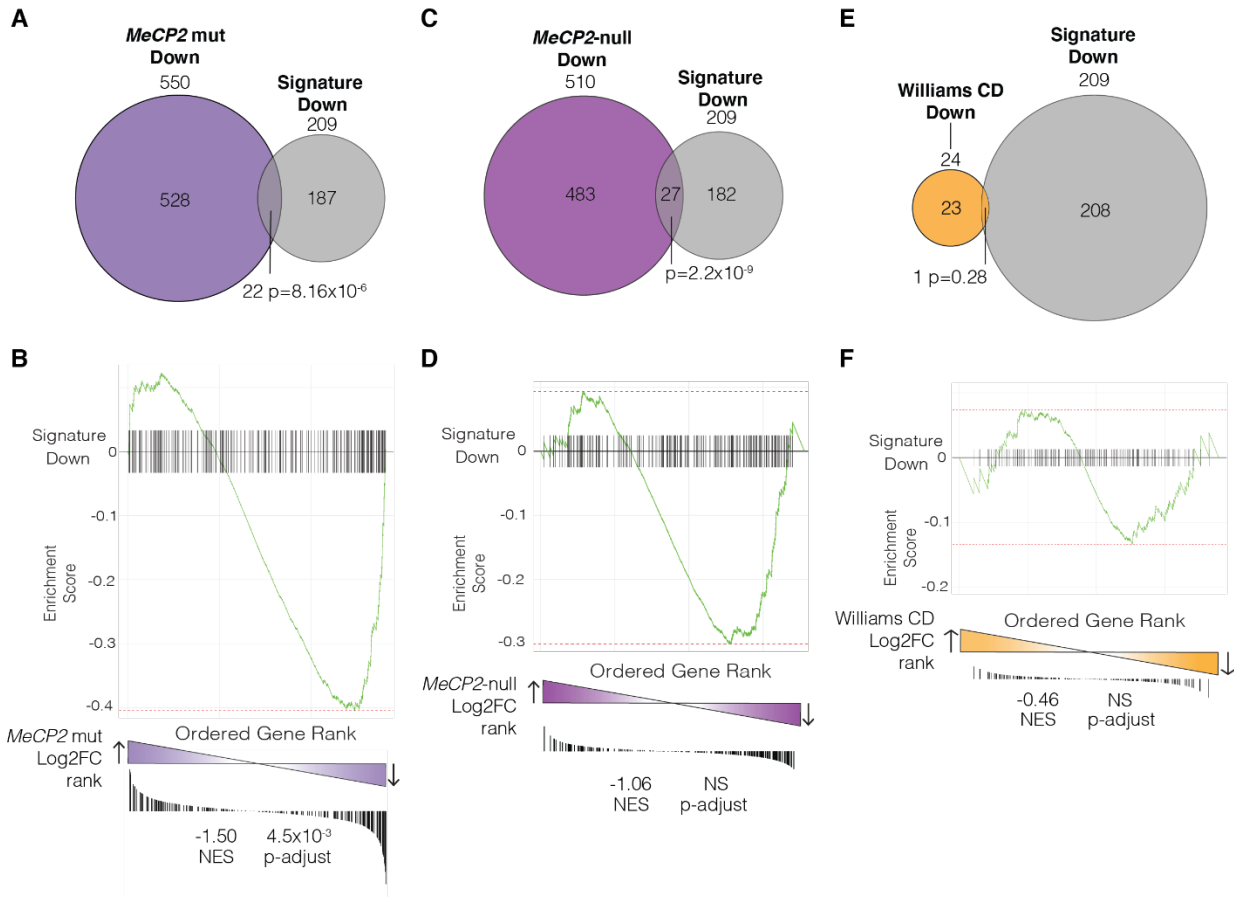

810

811

812 **Supplemental Figure 6. Examination of downregulated transcriptional signature in**

813 **additional mouse models of NDDs.** (A-B) Overlap (A) and GSEA (B) analysis of

814 downregulated transcriptional signature compared to differentially expressed genes in a mouse

815 model of Rett Syndrome containing a mutated *MeCP2* gene (T158M), frequently seen in human

816 RTT patients. (C-D) Overlap (C) and GSEA (D) analysis of downregulated transcriptional

817 signature compared to differentially expressed genes in a mouse model of Williams Syndrome

818 containing the full deletion comparable to that seen in human patients. Overlap significance

819 based on hypergeometric tests. 'mut' indicates *MeCP2* T158M mutation commonly found in

820 cases of RTT. CD indicates complete deletion on 5G2 analogous to the human Williams

821 Syndrome Critical Region on 7q11.23. NES indicates normalized enrichment score.

822

823

824

825

826 **Supplemental Figure 7**

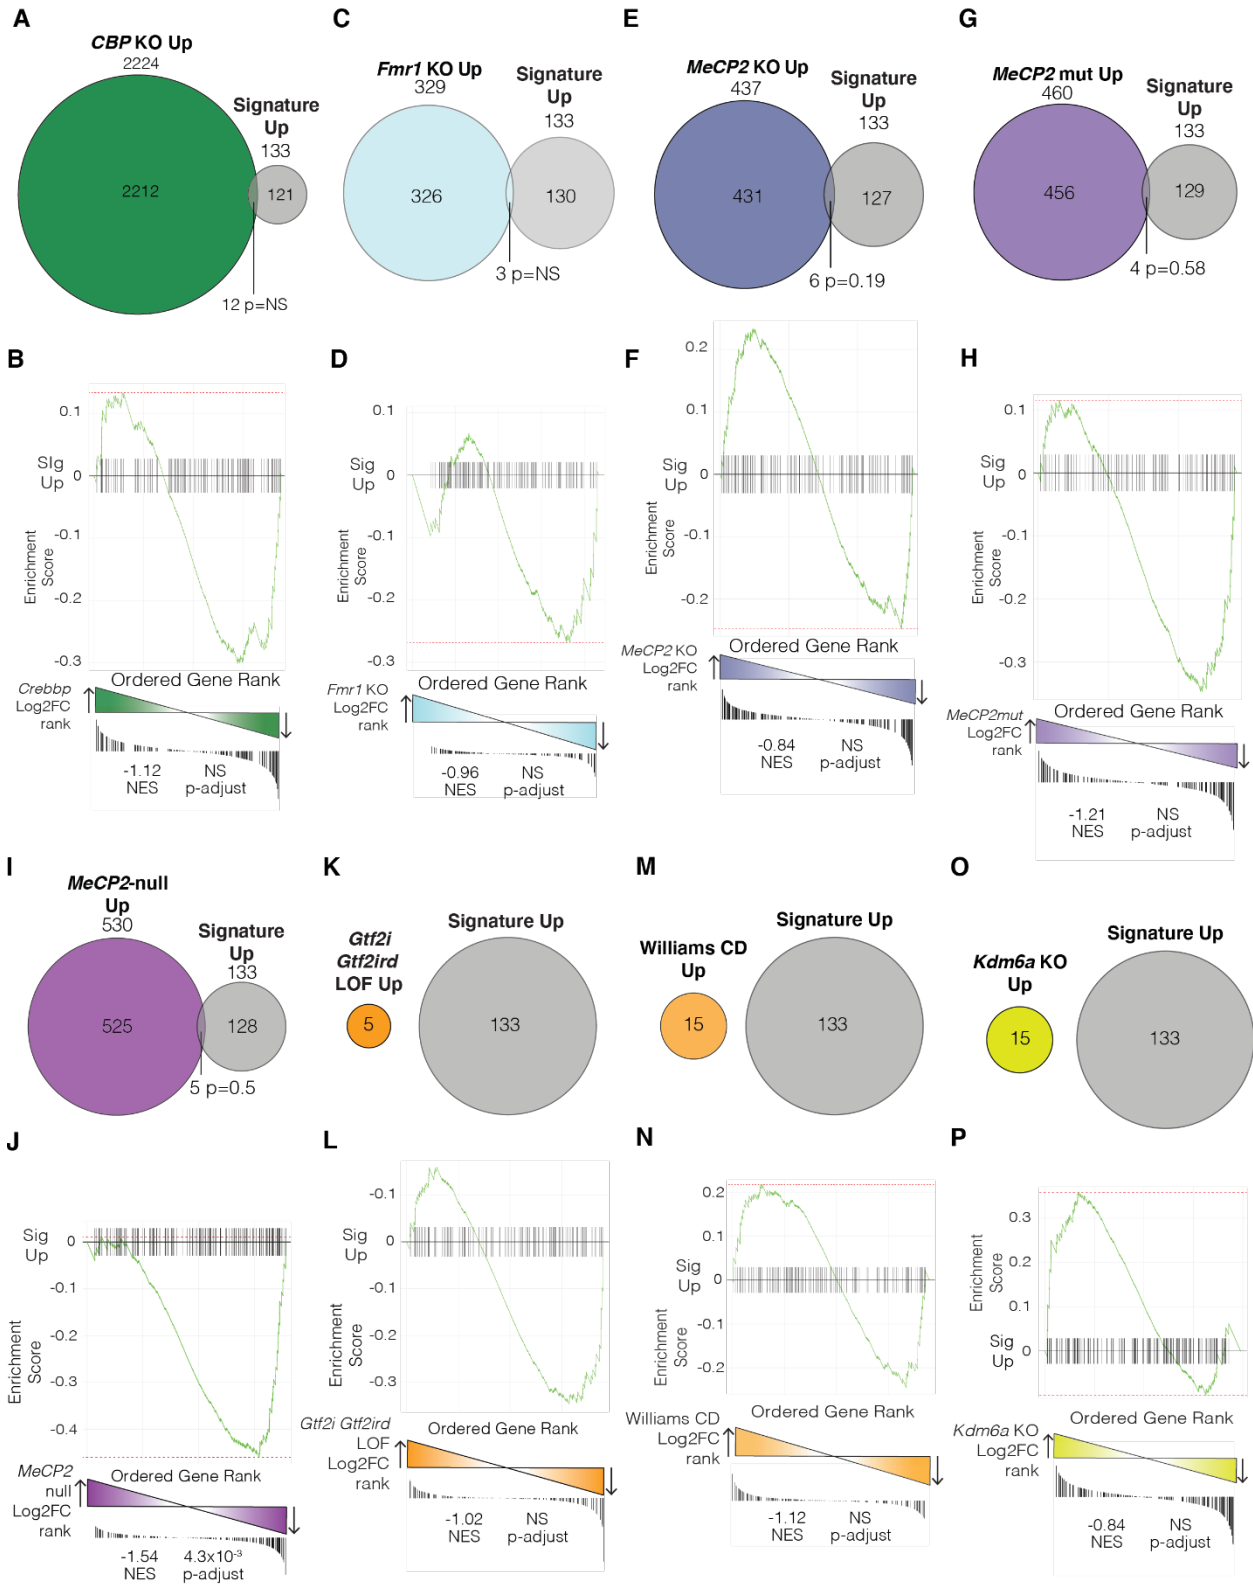

827

828 **Supplemental Figure 7. Examination of upregulated transcriptional signature in mouse**  
829 **models of NDDs.** (A-B) Overlap (A) and GSEA (B) analysis of upregulated transcriptional  
830 signature compared to differentially expressed genes in a *Kat3a* double KO mouse model of  
831 Rubinstein-Taybi Syndrome. (C-D) Overlap (C) and GSEA (D) analysis of upregulated  
832 transcriptional signature compared to differentially expressed genes in a *Fmr1* KO mouse model  
833 of FXS. (E-F). Overlap (E) and GSEA (F) analysis of upregulated transcriptional signature  
834 compared to differentially expressed genes in a *MeCP2* KO mouse model of Rett Syndrome.  
835 (G-H) Overlap (G) and GSEA (H) analysis of upregulated transcriptional signature compared to  
836 differentially expressed genes in a mouse model of Rett Syndrome containing a mutated  
837 *MeCP2* gene (T158M). (I-J) Overlap (I) and GSEA (J) analysis of upregulated transcriptional  
838 signature compared to differentially expressed genes in a *Gtf2i* and *Gtf2ird* double LOF mouse  
839 model of Williams Syndrome. (K-L) Overlap (K) and GSEA (L) analysis of upregulated  
840 transcriptional signature compared to differentially expressed genes in a mouse model of  
841 Williams Syndrome containing the full deletion comparable to that seen in human patients. (M-  
842 N) Overlap (M) and GSEA (N) analysis of upregulated transcriptional signature compared to  
843 differentially expressed genes in a *Kdm6a* KO mouse model of Kabuki Syndrome. Overlap  
844 significance based on hypergeometric tests. CD indicates complete deletion on 5G2 analogous  
845 to the human Williams Syndrome Critical Region on 7q11.23. 'mut' indicates *MeCP2* T158M  
846 mutation commonly found in cases of RTT. NES indicates normalized enrichment score.  
847

848 **Supplemental Figure 8**

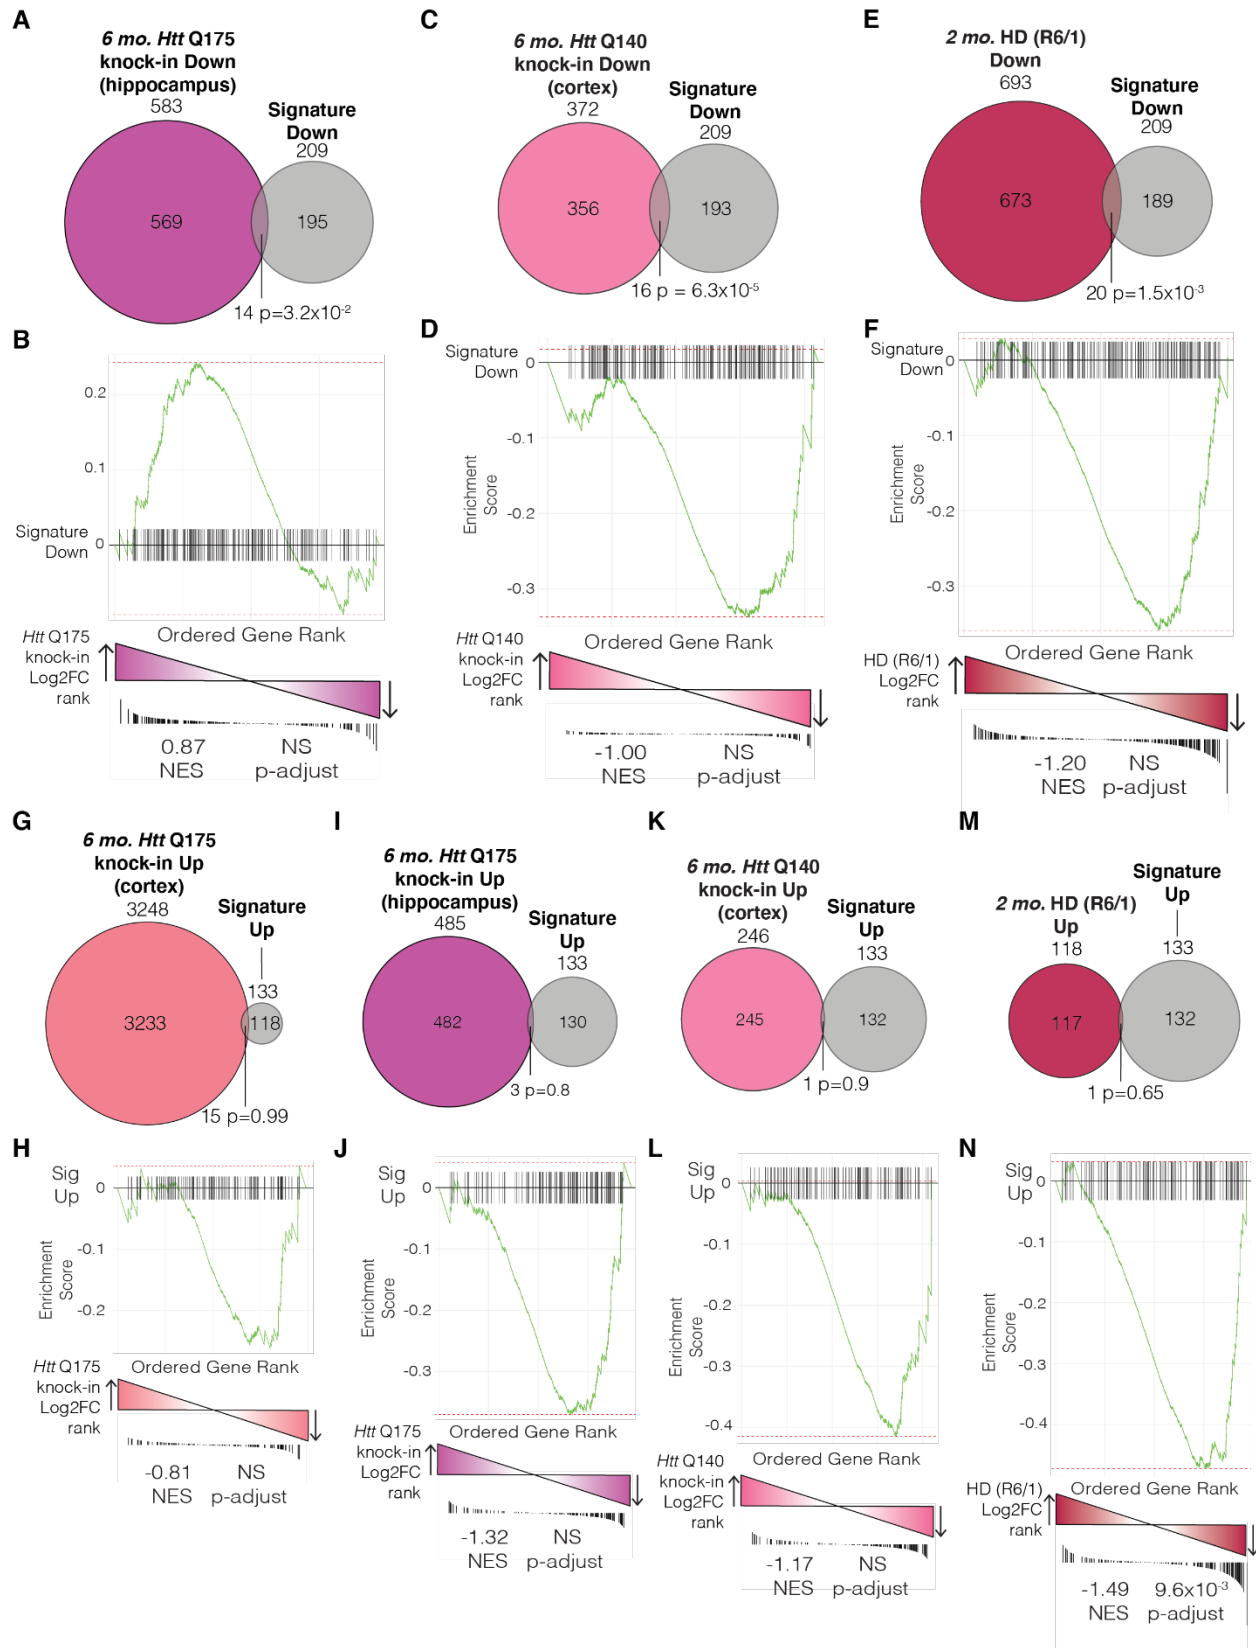

850 **Supplemental Figure 8. Examination of transcriptional signature in mouse models of**  
851 **Huntington's Disease.** (A-B) Overlap (A) and GSEA (B) analysis of downregulated  
852 transcriptional signature compared to differentially expressed genes from the hippocampus of a  
853 mouse model of Huntington's Disease containing 175 glutamine repeats. Mice were aged 6  
854 months along with littermate WT controls. (C-D) Overlap (C) and GSEA (D) analysis of  
855 downregulated transcriptional signature compared to differentially expressed genes from the  
856 cortex of a mouse model of Huntington's Disease containing 140 glutamine repeats. Mice were  
857 aged 6 months along with littermate WT controls. (E-F) Overlap (E) and GSEA (F) analysis of  
858 downregulated transcriptional signature compared to differentially expressed genes from the R6/1  
859 mouse model of Huntington's Disease containing 115 glutamine repeats. Mice were aged 2  
860 months along with age-matched controls. (G-H) Overlap (G) and GSEA (H) analysis of  
861 upregulated transcriptional signature compared to differentially expressed genes from the cortex  
862 of a mouse model of Huntington's Disease containing 175 repeats (corresponding to Fig. 5K-L)  
863 (I-J) Overlap (I) and GSEA (J) analysis of upregulated transcriptional signature compared to  
864 differentially expressed genes from the hippocampus of a mouse model of Huntington's Disease  
865 containing 175 repeats. (K-L) Overlap (K) and GSEA (L) analysis of upregulated transcriptional  
866 signature compared to differentially expressed genes from the cortex of a mouse model of  
867 Huntington's Disease containing 140 repeats. (M-N) Overlap (M) and GSEA (N) analysis of  
868 upregulated transcriptional signature compared to differentially expressed genes from the R6/1  
869 mouse model of Huntington's Disease containing 115 repeats. Overlap significance based on  
870 hypergeometric tests. NES indicates normalized enrichment score.  
871



872 **Supplemental Figure 9**

| A<br>Comparison to<br>Downregulated Signature |                   |                      | B<br>Comparison to<br>Upregulated Signature |                   |                       |
|-----------------------------------------------|-------------------|----------------------|---------------------------------------------|-------------------|-----------------------|
| BrainSpan<br>Module                           | Overlap<br>number | p-value              | BrainSpan<br>Module                         | Overlap<br>number | p-value               |
| 1                                             | 11                | 0.938                | 1                                           | 14                | 0.139                 |
| 2                                             | 8                 | 0.902                | 2                                           | 9                 | 0.309                 |
| 3                                             | 10                | 0.629                | 3                                           | 5                 | 0.807                 |
| 4                                             | 24                | 2.5x10 <sup>-6</sup> | 4                                           | 1                 | 0.995                 |
| 5                                             | 10                | 0.268                | 5                                           | 9                 | 0.061                 |
| 6                                             | 16                | 0.002                | 6                                           | 4                 | 0.657                 |
| 7                                             | 6                 | 0.666                | 7                                           | 27                | 8.7x10 <sup>-15</sup> |
| 8                                             | 7                 | 0.373                | 8                                           | 2                 | 0.887                 |
| 9                                             | 12                | 0.012                | 9                                           | 1                 | 0.973                 |
| 10                                            | 9                 | 0.071                | 10                                          | 2                 | 0.833                 |
| 11                                            | 9                 | 0.044                | 11                                          | 0                 | 1.000                 |
| 12                                            | 1                 | 0.987                | 12                                          | 5                 | 0.130                 |
| 13                                            | 7                 | 0.133                | 13                                          | 2                 | 0.748                 |
| 14                                            | 0                 | 1.000                | 14                                          | 0                 | 1.000                 |
| 15                                            | 9                 | 0.013                | 15                                          | 0                 | 1.000                 |
| 16                                            | 0                 | 1.000                | 16                                          | 4                 | 0.180                 |
| 17                                            | 1                 | 0.969                | 17                                          | 4                 | 0.170                 |
| 18                                            | 2                 | 0.819                | 18                                          | 0                 | 1.000                 |
| 19                                            | 4                 | 0.359                | 19                                          | 0                 | 1.000                 |
| 20                                            | 7                 | 0.031                | 20                                          | 0                 | 1.000                 |
| 21                                            | 3                 | 0.567                | 21                                          | 3                 | 0.282                 |
| 22                                            | 0                 | 1.000                | 22                                          | 1                 | 0.832                 |
| 23                                            | 0                 | 1.000                | 23                                          | 6                 | 0.008                 |
| 24                                            | 1                 | 0.929                | 24                                          | 2                 | 0.490                 |
| 25                                            | 1                 | 0.918                | 25                                          | 0                 | 1.000                 |
| 26                                            | 1                 | 0.913                | 26                                          | 0                 | 1.000                 |
| 27                                            | 3                 | 0.366                | 27                                          | 3                 | 0.154                 |
| 28                                            | 3                 | 0.322                | 28                                          | 0                 | 1.000                 |
| 29                                            | 3                 | 0.311                | 29                                          | 1                 | 0.710                 |
| 30                                            | 1                 | 0.854                | 30                                          | 0                 | 1.000                 |
| 31                                            | 6                 | 0.012                | 31                                          | 2                 | 0.334                 |
| 32                                            | 3                 | 0.253                | 32                                          | 0                 | 1.000                 |
| 33                                            | 0                 | 1.000                | 33                                          | 1                 | 0.664                 |
| 34                                            | 0                 | 1.000                | 34                                          | 1                 | 0.648                 |
| 35                                            | 2                 | 0.453                | 35                                          | 1                 | 0.620                 |
| 36                                            | 7                 | 8.8x10 <sup>-4</sup> | 36                                          | 0                 | 1.000                 |
| 37                                            | 0                 | 1.000                | 37                                          | 0                 | 1.000                 |
| 38                                            | 3                 | 0.141                | 38                                          | 2                 | 0.196                 |
| 39                                            | 1                 | 0.691                | 39                                          | 0                 | 1.000                 |
| 40                                            | 0                 | 1                    | 40                                          | 0                 | 1.000                 |
| 41                                            | 0                 | 1                    | 41                                          | 0                 | 1.000                 |

873  
 874 **Supplemental Figure 9. Developmental expression of transcriptional signature. (A-B)**  
 875 Overlap of the downregulated (A) or upregulated (B) transcriptional signature with modules of  
 876 co-expressing genes identified from human BrainSpan data. Overlap significance based on  
 877 hypergeometric tests with significant overlaps highlighted in orange. Significance based on 5%  
 878 FDR threshold corrected for multiple comparisons using the Benjamini-Hochberg method.

879 **Supplemental Figure 10**

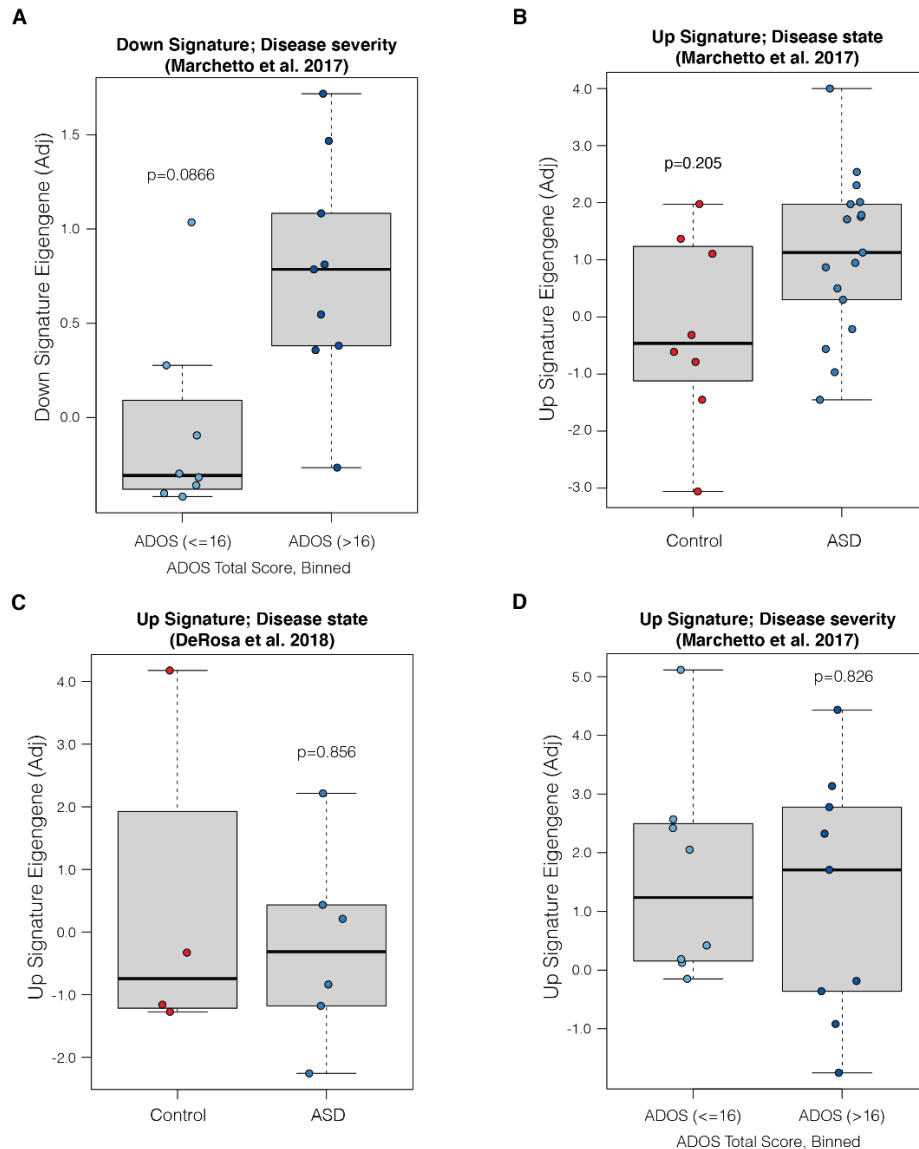

880

881 **Supplemental Figure 10. Transcriptional signature in human iPSC-derived neurons with**

882 **idiopathic ASD.** (A) RNA deconvolution analysis of idiopathic ASD patient iPSC derived

883 neurons separated by ADOS score using the downregulated transcriptional signature. (B) RNA

884 deconvolution analysis of control and idiopathic ASD patient iPSC derived neurons (Marchetto

885 et al., 2017) using the upregulated transcriptional signature. (C) RNA deconvolution analysis of

886 control and idiopathic ASD patient iPSC derived neurons from an additional dataset (DeRosa et

887 al., 2018) using the upregulated transcriptional signature. (D) RNA deconvolution analysis of

888 idiopathic ASD patient iPSC derived neurons separated by ADOS score using the upregulated

889 transcriptional signature. Control indicates neurons derived from neurotypical human iPSCs.

890 'Adj' indicates adjusted.

891 **References**

- 892 Abrahams, B.S., Arking, D.E., Campbell, D.B., Mefford, H.C., Morrow, E.M., Weiss, L.A.,  
893 Menashe, I., Wadkins, T., Banerjee-Basu, S., and Packer, A. (2013). SFARI Gene 2.0: a  
894 community-driven knowledgebase for the autism spectrum disorders (ASDs). *Mol. Autism* 4, 36.
- 895 Barak, B., Zhang, Z., Liu, Y., Nir, A., Trangle, S.S., Ennis, M., Levandowski, K.M., Wang, D.,  
896 Quast, K., Boulting, G.L., et al. (2019). Neuronal deletion of *Gtf2i*, associated with Williams  
897 syndrome, causes behavioral and myelin alterations rescuable by a remyelinating drug. *Nat.*  
898 *Neurosci.* 22, 700–708.
- 899 Benevento, M., Iacono, G., Selten, M., Ba, W., Oudakker, A., Frega, M., Keller, J., Mancini, R.,  
900 Lewerissa, E., Kleefstra, T., et al. (2016). Histone Methylation by the Kleefstra Syndrome  
901 Protein EHMT1 Mediates Homeostatic Synaptic Scaling. *Neuron* 91, 341–355.
- 902 Benjamini, Y., and Hochberg, Y. (1995). Controlling the False Discovery Rate: A Practical and  
903 Powerful Approach to Multiple Testing. *J. R. Stat. Soc. Ser. B Methodol.* 57, 289–300.
- 904 Berger, S.L. (2007). The complex language of chromatin regulation during transcription. *Nature*  
905 447, 407–412.
- 906 Bernier, R., Golzio, C., Xiong, B., Stessman, H.A., Coe, B.P., Penn, O., Witherspoon, K.,  
907 Gerdts, J., Baker, C., Vulto-Van Silfhout, A.T., et al. (2014). Disruptive CHD8 mutations define  
908 a subtype of autism early in development. *Cell* 158, 263–276.
- 909 Bernstein, B.E., Mikkelsen, T.S., Xie, X., Kamal, M., Huebert, D.J., Cuff, J., Fry, B., Meissner,  
910 A., Wernig, M., Plath, K., et al. (2006). A bivalent chromatin structure marks key developmental  
911 genes in embryonic stem cells. *Cell* 125, 315–326.
- 912 Borrelli, E., Nestler, E.J., Allis, C.D., and Sassone-Corsi, P. (2008). Decoding the epigenetic  
913 language of neuronal plasticity. *Neuron* 60, 961–974.
- 914 Chen, M.B., Jiang, X., Quake, S.R., and Südhof, T.C. (2020). Persistent transcriptional  
915 programmes are associated with remote memory. *Nature* 587, 437–442.
- 916 Coupry, I., Roudaut, C., Stef, M., Delrue, M.-A., Marche, M., Burgelin, I., Taine, L., Cruaud, C.,  
917 Lacombe, D., and Arveiler, B. (2002). Molecular analysis of the CBP gene in 60 patients with  
918 Rubinstein-Taybi syndrome. *J. Med. Genet.* 39, 415–421.
- 919 Court, F., and Arnaud, P. (2017). An annotated list of bivalent chromatin regions in human ES  
920 cells: a new tool for cancer epigenetic research. *Oncotarget* 8, 4110–4124.
- 921 Dai, L., Bellugi, U., Chen, X.-N., Pulst-Korenberg, A.M., Järvinen-Pasley, A., Tirosh-Wagner,  
922 T., Eis, P.S., Graham, J., Mills, D., Searcy, Y., et al. (2009). Is it Williams syndrome?  
923 *GTF2IRD1* implicated in visual-spatial construction and *GTF2I* in sociability revealed by high  
924 resolution arrays. *Am. J. Med. Genet. A.* 149A, 302–314.

- 925 Darnell, J.C., Van Driesche, S.J., Zhang, C., Hung, K.Y.S., Mele, A., Fraser, C.E., Stone, E.F.,  
926 Chen, C., Fak, J.J., Chi, S.W., et al. (2011). FMRP stalls ribosomal translocation on mRNAs  
927 linked to synaptic function and autism. *Cell* *146*, 247–261.
- 928 De Rubeis, S., He, X., Goldberg, A.P., Poultney, C.S., Samocha, K., Cicek, A.E., Kou, Y., Liu,  
929 L., Fromer, M., Walker, S., et al. (2014). Synaptic, transcriptional and chromatin genes disrupted  
930 in autism. *Nature* *515*, 209–215.
- 931 DeRosa, B.A., El Hokayem, J., Artimovich, E., Garcia-Serje, C., Phillips, A.W., Van Booven,  
932 D., Nestor, J.E., Wang, L., Cuccaro, M.L., Vance, J.M., et al. (2018). Convergent Pathways in  
933 Idiopathic Autism Revealed by Time Course Transcriptomic Analysis of Patient-Derived  
934 Neurons. *Sci. Rep.* *8*, 8423.
- 935 Eram, M.S., Kuznetsova, E., Li, F., Lima-Fernandes, E., Kennedy, S., Chau, I., Arrowsmith,  
936 C.H., Schapira, M., and Vedadi, M. (2015). Kinetic characterization of human histone H3 lysine  
937 36 methyltransferases, ASH1L and SETD2. *Biochim. Biophys. Acta BBA - Gen. Subj.* *1850*,  
938 1842–1848.
- 939 Ernst, J., and Kellis, M. (2017). Chromatin-state discovery and genome annotation with  
940 ChromHMM. *Nat. Protoc.* *12*, 2478–2492.
- 941 Frank, C.L., and Tsai, L.-H. (2009). Alternative functions of core cell cycle regulators in  
942 neuronal migration, neuronal maturation, and synaptic plasticity. *Neuron* *62*, 312–326.
- 943 Fu, J.M., Satterstrom, F.K., Peng, M., Brand, H., Collins, R.L., Dong, S., Klei, L., Stevens, C.R.,  
944 Cusick, C., Babadi, M., et al. (2021). Rare coding variation illuminates the allelic architecture,  
945 risk genes, cellular expression patterns, and phenotypic context of autism. *MedRxiv*  
946 2021.12.20.21267194.
- 947 Gao, Y., Duque-Wilckens, N., Aljazi, M.B., Wu, Y., Moeser, A.J., Mias, G.I., Robison, A.J., and  
948 He, J. (2021). Loss of histone methyltransferase ASH1L in the developing mouse brain causes  
949 autistic-like behaviors. *Commun. Biol.* *4*, 756.
- 950 Good, K.V., Vincent, J.B., and Ausió, J. (2021). MeCP2: The Genetic Driver of Rett Syndrome  
951 Epigenetics. *Front. Genet.* *12*, 620859.
- 952 Gorkin, D.U., Barozzi, I., Zhao, Y., Zhang, Y., Huang, H., Lee, A.Y., Li, B., Chiou, J.,  
953 Wildberg, A., Ding, B., et al. (2020). An atlas of dynamic chromatin landscapes in mouse fetal  
954 development. *Nature* *583*, 744–751.
- 955 Heberle, H., Meirelles, G.V., da Silva, F.R., Telles, G.P., and Minghim, R. (2015).  
956 InteractiVenn: a web-based tool for the analysis of sets through Venn diagrams. *BMC*  
957 *Bioinformatics* *16*, 169.
- 958 Huang, E., Qu, D., Zhang, Y., Venderova, K., Haque, M.E., Rousseaux, M.W.C., Slack, R.S.,  
959 Woulfe, J.M., and Park, D.S. (2010). The role of Cdk5-mediated apurinic/aprimidinic  
960 endonuclease 1 phosphorylation in neuronal death. *Nat. Cell Biol.* *12*, 563–571.

- 961 Ietswaart, R., Gyori, B.M., Bachman, J.A., Sorger, P.K., and Churchman, L.S. (2021).  
962 GeneWalk identifies relevant gene functions for a biological context using network  
963 representation learning. *Genome Biol.* 22, 55.
- 964 Iossifov, I., O’Roak, B.J., Sanders, S.J., Ronemus, M., Krumm, N., Levy, D., Stessman, H.A.,  
965 Witherspoon, K.T., Vives, L., Patterson, K.E., et al. (2014). The contribution of de novo coding  
966 mutations to autism spectrum disorder. *Nature* 515, 216–221.
- 967 Ip, J.P.K., Mellios, N., and Sur, M. (2018). Rett syndrome: insights into genetic, molecular and  
968 circuit mechanisms. *Nat. Rev. Neurosci.* 19, 368–382.
- 969 Jaffe, A.E., Tao, R., Norris, A.L., Kealhofer, M., Nellore, A., Shin, J.H., Kim, D., Jia, Y., Hyde,  
970 T.M., Kleinman, J.E., et al. (2017). qSVA framework for RNA quality correction in differential  
971 expression analysis. *Proc. Natl. Acad. Sci. U. S. A.* 114, 7130–7135.
- 972 Jenuwein, T., and Allis, C.D. (2001). Translating the histone code. *Science* 293, 1074–1080.
- 973 Ji, X., Kember, R.L., Brown, C.D., and Bućan, M. (2016). Increased burden of deleterious  
974 variants in essential genes in autism spectrum disorder. *Proc. Natl. Acad. Sci. U. S. A.* 113,  
975 15054–15059.
- 976 Jiang, Y., Fu, X., Zhang, Y., Wang, S.-F., Zhu, H., Wang, W.-K., Zhang, L., Wu, P., Wong,  
977 C.C.L., Li, J., et al. (2021). Rett syndrome linked to defects in forming the MeCP2/Rbfox/LASR  
978 complex in mouse models. *Nat. Commun.* 12, 5767.
- 979 Jin, Q., Yu, L.-R., Wang, L., Zhang, Z., Kasper, L.H., Lee, J.-E., Wang, C., Brindle, P.K., Dent,  
980 S.Y.R., and Ge, K. (2011). Distinct roles of GCN5/PCAF-mediated H3K9ac and CBP/p300-  
981 mediated H3K18/27ac in nuclear receptor transactivation: Histone acetylation and gene  
982 activation. *EMBO J.* 30, 249–262.
- 983 Kleefstra, T., Brunner, H.G., Amiel, J., Oudakker, A.R., Nillesen, W.M., Magee, A., Geneviève,  
984 D., Cormier-Daire, V., van Esch, H., Fryns, J.-P., et al. (2006). Loss-of-function mutations in  
985 euchromatin histone methyl transferase 1 (EHMT1) cause the 9q34 subtelomeric deletion  
986 syndrome. *Am. J. Hum. Genet.* 79, 370–377.
- 987 Kleefstra, T., van Zelst-Stams, W.A., Nillesen, W.M., Cormier-Daire, V., Houge, G., Foulds, N.,  
988 van Dooren, M., Willemsen, M.H., Pfundt, R., Turner, A., et al. (2009). Further clinical and  
989 molecular delineation of the 9q subtelomeric deletion syndrome supports a major contribution of  
990 EHMT1 haploinsufficiency to the core phenotype. *J. Med. Genet.* 46, 598–606.
- 991 Kopp, N., McCullough, K., Maloney, S.E., and Dougherty, J.D. (2019). Gtf2i and Gtf2ird1  
992 mutation do not account for the full phenotypic effect of the Williams syndrome critical region in  
993 mouse models. *Hum. Mol. Genet.* 28, 3443–3465.
- 994 Korb, E., Herre, M., Zucker-Scharff, I., Darnell, R.B., and Allis, C.D. (2015). BET protein Brd4  
995 activates transcription in neurons and BET inhibitor Jq1 blocks memory in mice. *Nat. Neurosci.*  
996 18, 1464–1473.

- 997 Korb, E., Herre, M., Zucker-Scharff, I., Gresack, J., Allis, C.D., and Darnell, R.B. (2017). Excess  
998 Translation of Epigenetic Regulators Contributes to Fragile X Syndrome and Is Alleviated by  
999 Brd4 Inhibition. *Cell* *170*, 1209–1223.e20.
- 1000 Kurotaki, N., Imaizumi, K., Harada, N., Masuno, M., Kondoh, T., Nagai, T., Ohashi, H.,  
1001 Naritomi, K., Tsukahara, M., Makita, Y., et al. (2002). Haploinsufficiency of NSD1 causes Sotos  
1002 syndrome. *Nat. Genet.* *30*, 365–366.
- 1003 Langfelder, P., Cantle, J.P., Chatzopoulou, D., Wang, N., Gao, F., Al-Ramahi, I., Lu, X.-H.,  
1004 Ramos, E.M., El-Zein, K., Zhao, Y., et al. (2016). Integrated genomics and proteomics define  
1005 huntingtin CAG length-dependent networks in mice. *Nat. Neurosci.* *19*, 623–633.
- 1006 Lim, S., and Kaldis, P. (2013). Cdks, cyclins and CKIs: roles beyond cell cycle regulation.  
1007 *Development* *140*, 3079–3093.
- 1008 Lipinski, M., Muñoz-Viana, R., del Blanco, B., Marquez-Galera, A., Medrano-Relinque, J.,  
1009 Caramés, J.M., Szczepankiewicz, A.A., Fernandez-Albert, J., Navarrón, C.M., Olivares, R., et al.  
1010 (2020). KAT3-dependent acetylation of cell type-specific genes maintains neuronal identity in  
1011 the adult mouse brain. *Nat. Commun.* *11*, 2588.
- 1012 Lord, C., Risi, S., Lambrecht, L., Cook, Jr., E.H., Leventhal, B.L., DiLavore, P.C., Pickles, A.,  
1013 and Rutter, M. (2000). The Autism Diagnostic Observation Schedule—Generic: A Standard  
1014 Measure of Social and Communication Deficits Associated with the Spectrum of Autism. *J.*  
1015 *Autism Dev. Disord.* *30*, 205–223.
- 1016 Marchetto, M.C., Belinson, H., Tian, Y., Freitas, B.C., Fu, C., Vadodaria, K.C., Beltrao-Braga,  
1017 P.C., Trujillo, C.A., Mendes, A.P.D., Padmanabhan, K., et al. (2017). Altered proliferation and  
1018 networks in neural cells derived from idiopathic autistic individuals. *Mol. Psychiatry* *22*, 820–  
1019 835.
- 1020 Miyazaki, H., Higashimoto, K., Yada, Y., Endo, T.A., Sharif, J., Komori, T., Matsuda, M.,  
1021 Koseki, Y., Nakayama, M., Soejima, H., et al. (2013). Ash11 Methylates Lys36 of Histone H3  
1022 Independently of Transcriptional Elongation to Counteract Polycomb Silencing. *PLoS Genet.* *9*,  
1023 e1003897.
- 1024 Neale, B.M., Kou, Y., Liu, L., Ma’ayan, A., Samocha, K.E., Sabo, A., Lin, C.-F., Stevens, C.,  
1025 Wang, L.-S., Makarov, V., et al. (2012). Patterns and rates of exonic de novo mutations in autism  
1026 spectrum disorders. *Nature* *485*, 242–245.
- 1027 Niere, F., Wilkerson, J.R., and Huber, K.M. (2012). Evidence for a fragile X mental retardation  
1028 protein-mediated translational switch in metabotropic glutamate receptor-triggered Arc  
1029 translation and long-term depression. *J. Neurosci. Off. J. Soc. Neurosci.* *32*, 5924–5936.
- 1030 Niikawa, N. (2004). Molecular basis of Sotos syndrome. *Horm. Res.* *62 Suppl 3*, 60–65.
- 1031 O’Roak, B.J., Vives, L., Girirajan, S., Karakoc, E., Krumm, N., Coe, B.P., Levy, R., Ko, A.,  
1032 Lee, C., Smith, J.D., et al. (2012). Sporadic autism exomes reveal a highly interconnected protein  
1033 network of de novo mutations. *Nature* *485*, 246–250.



- 1034 Ohnuma, S., and Harris, W.A. (2003). Neurogenesis and the Cell Cycle. *Neuron* *40*, 199–208.
- 1035 Pacheco, N.L., Heaven, M.R., Holt, L.M., Crossman, D.K., Boggio, K.J., Shaffer, S.A., Flint,  
1036 D.L., and Olsen, M.L. (2017). RNA sequencing and proteomics approaches reveal novel deficits  
1037 in the cortex of Mecp2-deficient mice, a model for Rett syndrome. *Mol. Autism* *8*, 56.
- 1038 Parikshak, N.N., Luo, R., Zhang, A., Won, H., Lowe, J.K., Chandran, V., Horvath, S., and  
1039 Geschwind, D.H. (2013). XIntegrative functional genomic analyses implicate specific molecular  
1040 pathways and circuits in autism. *Cell* *155*, 1008.
- 1041 Peixoto, L., and Abel, T. (2013). The role of histone acetylation in memory formation and  
1042 cognitive impairments. *Neuropsychopharmacol. Off. Publ. Am. Coll. Neuropsychopharmacol.*  
1043 *38*, 62–76.
- 1044 Phan, B.N., Bohlen, J.F., Davis, B.A., Ye, Z., Chen, H.-Y., Mayfield, B., Sripathy, S.R., Cerceo  
1045 Page, S., Campbell, M.N., Smith, H.L., et al. (2020). A myelin-related transcriptomic profile is  
1046 shared by Pitt-Hopkins syndrome models and human autism spectrum disorder. *Nat. Neurosci.*  
1047 *23*, 375–385.
- 1048 Qiao, Q., Li, Y., Chen, Z., Wang, M., Reinberg, D., and Xu, R.-M. (2011). The Structure of  
1049 NSD1 Reveals an Autoregulatory Mechanism Underlying Histone H3K36 Methylation. *J. Biol.*  
1050 *Chem.* *286*, 8361–8368.
- 1051 Rangasamy, S., D’Mello, S.R., and Narayanan, V. (2013). Epigenetics, autism spectrum, and  
1052 neurodevelopmental disorders. *Neurother. J. Am. Soc. Exp. Neurother.* *10*, 742–756.
- 1053 Sanders, S.J., Murtha, M.T., Gupta, A.R., Murdoch, J.D., Raubeson, M.J., Willsey, A.J., Ercan-  
1054 Sencicek, A.G., DiLullo, N.M., Parikshak, N.N., Stein, J.L., et al. (2012). De novo mutations  
1055 revealed by whole-exome sequencing are strongly associated with autism. *Nature* *485*, 237–241.
- 1056 Segura-Puimedon, M., Sahún, I., Velot, E., Dubus, P., Borralleras, C., Rodrigues, A.J., Valero,  
1057 M.C., Valverde, O., Sousa, N., Herault, Y., et al. (2014). Heterozygous deletion of the Williams–  
1058 Beuren syndrome critical interval in mice recapitulates most features of the human disorder.  
1059 *Hum. Mol. Genet.* *23*, 6481–6494.
- 1060 Shen, W., Krautscheid, P., Rutz, A.M., Bayrak-Toydemir, P., and Dugan, S.L. (2019). De novo  
1061 loss-of-function variants of ASH1L are associated with an emergent neurodevelopmental  
1062 disorder. *Eur. J. Med. Genet.* *62*, 55–60.
- 1063 Spencer, C.M., Alekseyenko, O., Serysheva, E., Yuva-Paylor, L.A., and Paylor, R. (2005).  
1064 Altered anxiety-related and social behaviors in the Fmr1 knockout mouse model of fragile X  
1065 syndrome. *Genes Brain Behav.* *4*, 420–430.
- 1066 Spencer, C.M., Graham, D.F., Yuva-Paylor, L.A., Nelson, D.L., and Paylor, R. (2008). Social  
1067 behavior in Fmr1 knockout mice carrying a human FMR1 transgene. *Behav. Neurosci.* *122*, 710–  
1068 715.



- 1069 Strahl, B.D., and Allis, C.D. (2000). The language of covalent histone modifications. *Nature* *403*,  
1070 41–45.
- 1071 Supek, F., Bošnjak, M., Škunca, N., and Šmuc, T. (2011). REVIGO summarizes and visualizes  
1072 long lists of gene ontology terms. *PloS One* *6*, e21800.
- 1073 Tachibana, M., Matsumura, Y., Fukuda, M., Kimura, H., and Shinkai, Y. (2008). G9a/GLP  
1074 complexes independently mediate H3K9 and DNA methylation to silence transcription. *EMBO*  
1075 *J.* *27*, 2681–2690.
- 1076 Thompson, B.A., Tremblay, V., Lin, G., and Bochar, D.A. (2008). CHD8 is an ATP-dependent  
1077 chromatin remodeling factor that regulates beta-catenin target genes. *Mol. Cell. Biol.* *28*, 3894–  
1078 3904.
- 1079 Turner, B.M. (2000). Histone acetylation and an epigenetic code. *BioEssays News Rev. Mol.*  
1080 *Cell. Dev. Biol.* *22*, 836–845.
- 1081 Van Laarhoven, P.M., Neitzel, L.R., Quintana, A.M., Geiger, E.A., Zackai, E.H., Clouthier,  
1082 D.E., Artinger, K.B., Ming, J.E., and Shaikh, T.H. (2015). Kabuki syndrome genes *KMT2D* and  
1083 *KDM6A*: functional analyses demonstrate critical roles in craniofacial, heart and brain  
1084 development. *Hum. Mol. Genet.* *24*, 4443–4453.
- 1085 Voigt, P., Tee, W.-W., and Reinberg, D. (2013). A double take on bivalent promoters. *Genes*  
1086 *Dev.* *27*, 1318–1338.
- 1087 Wagner, E.J., and Carpenter, P.B. (2012). Understanding the language of Lys36 methylation at  
1088 histone H3. *Nat. Rev. Mol. Cell Biol.* *13*, 115–126.
- 1089 Wright, C., Shin, J.H., Rajpurohit, A., Deep-Soboslay, A., Collado-Torres, L., Brandon, N.J.,  
1090 Hyde, T.M., Kleinman, J.E., Jaffe, A.E., Cross, A.J., et al. (2017). Altered expression of  
1091 histamine signaling genes in autism spectrum disorder. *Transl. Psychiatry* *7*, e1126.
- 1092 Xu, S.-J., Lombroso, S.I., Fischer, D.K., Carpenter, M.D., Marchione, D.M., Hamilton, P.J.,  
1093 Lim, C.J., Neve, R.L., Garcia, B.A., Wimmer, M.E., et al. (2021). Chromatin-mediated  
1094 alternative splicing regulates cocaine-reward behavior. *Neuron* *109*, 2943-2966.e8.
- 1095 Yildirim, F., Ng, C.W., Kappes, V., Ehrenberger, T., Rigby, S.K., Stivanello, V., Gipson, T.A.,  
1096 Soltis, A.R., Vanhoutte, P., Caboche, J., et al. (2019). Early epigenomic and transcriptional  
1097 changes reveal Elk-1 transcription factor as a therapeutic target in Huntington’s disease. *Proc.*  
1098 *Natl. Acad. Sci. U. S. A.* *116*, 24840–24851.
- 1099 Young, E.J., Lipina, T., Tam, E., Mandel, A., Clapcote, S.J., Bechard, A.R., Chambers, J.,  
1100 Mount, H.T.J., Fletcher, P.J., Roder, J.C., et al. (2008). Reduced fear and aggression and altered  
1101 serotonin metabolism in *Gtf2ird1*-targeted mice. *Genes Brain Behav.* *7*, 224–234.
- 1102 Zhao, Y.-T., Kwon, D.Y., Johnson, B.S., Fasolino, M., Lamonica, J.M., Kim, Y.J., Zhao, B.S.,  
1103 He, C., Vahedi, G., Kim, T.H., et al. (2018). Long genes linked to autism spectrum disorders  
1104 harbor broad enhancer-like chromatin domains. *Genome Res.* *28*, 933–942.
